# Supplementary material for: Minimizing base stoichiometry in Pd(0)/g-C3N4O catalyzed Suzuki–Miyaura cross-coupling reaction
Source: Royal Society of Chemistry journal article supplement (doi:10.1039/d3nj03270a), 2023-01-01
Supplement: d3nj03270a1.pdf [file d3nj03270a1.pdf]

## Supporting Information

### Minimizing base-stoichiometry in Pd(0)/g-C<sub>3</sub>N<sub>4</sub>O catalyzed Suzuki-Miyaura cross-coupling reaction

Dipika Konwar<sup>a</sup>, Rakhee Saikia<sup>a</sup>, Risha Kalita<sup>a</sup>, Manash R. Das<sup>b,c</sup> and Utpal Bora<sup>a\*</sup>

<sup>a</sup>Department of Chemical Sciences, Tezpur University, Napaam, Tezpur, Assam 784028, India

<sup>b</sup>Advanced Materials Group, Materials Sciences and Technology Division, CSIR-North East  
Institute of Science and Technology, Jorhat 785006 Assam, India

<sup>c</sup>Academy of Scientific and Innovative Research (AcSIR), Ghaziabad 201002, India

### Table of Contents

|   |                                                        |         |
|---|--------------------------------------------------------|---------|
| A | Calculation of green chemistry matrices                | S2      |
| B | General procedure for synthesis of biaryls             | S2      |
| C | <sup>1</sup> H and <sup>13</sup> C NMR analytical data | S3-S9   |
| D | <sup>1</sup> H and <sup>13</sup> C NMR spectra         | S10-S34 |
| E | <sup>19</sup> F NMR spectra                            | S35     |
| F | XPS survey spectrum                                    | S36     |
| G | References                                             | S37-S38 |

### Calculation of green chemistry matrices:

Our work: 1-Bromo-4-nitrobenzene (0.101g, 0.5 mmol) and Phenylboronic acid (0.0609g, 0.5 mmol) reacted in presence of Pd(0)/g-C<sub>3</sub>N<sub>4</sub>O (0.005g, 5 wt%), and K<sub>2</sub>CO<sub>3</sub> (0.0345g, 0.25 mmol) in Ethanol medium (2 mL, 0.004g) (excluding water) to form 4-Nitrobiphenyl (0.0978g, 0.49 mmol).

Mass intensity = Total mass used in the process/ Mass of product

$$= (0.101+0.0609+0.005+0.0345+0.004)\text{g}/0.0978\text{g}$$

$$= 2.1$$

Mass productivity = (1/Mass intensity) x 100

$$= (1/2.1) \times 100$$

$$= 47.6\%$$

E-factor = Mass intensity-1

$$= 2.1-1$$

$$= 1.1$$

### General procedure for synthesis of biaryls:

A mixture of aryl bromide (0.5 mmol), arylboronic acid (0.5 mmol), Pd(0)/g-C<sub>3</sub>N<sub>4</sub>O (5wt%), K<sub>2</sub>CO<sub>3</sub> (0.25 mmol), and EtOH:H<sub>2</sub>O (1:1) (4 mL) were taken in a 50 mL round bottomed flask and stirred at room temperature for 5 hours. After completion of the reaction (monitoring by TLC), the reaction mixture was diluted with water (10 mL) and extracted with ethyl acetate (3 x 20 mL). The combined organic layers were washed with brine solution (20 mL) and the organic layer was dried over anhydrous sodium sulfate. The crude was obtained by evaporating the solvent under reduced pressure in a rotary evaporator. To obtain the desired product, purification of the crude was done by column chromatography using silica gel (60-120 mesh) and hexane:ethyl acetate as solvent system.

$^1\text{H}$  and  $^{13}\text{C}$  NMR analytical data:

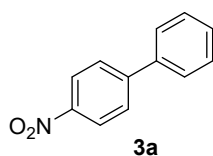

**4-nitro-1,1'-biphenyl (3a)**<sup>1,2</sup>: Obtained by general procedure, white solid (98% yield),  $^1\text{H}$  NMR (400 MHz,  $\text{CDCl}_3$ )  $\delta$  8.30–8.24 (m, 2H), 7.75–7.68 (m, 2H), 7.63–7.59 (m, 2H), 7.52–7.41 (m, 3H);  $^{13}\text{C}$  NMR (100 MHz,  $\text{CDCl}_3$ )  $\delta$  147.7, 147.2, 138.8, 129.3, 127.9, 127.6, 127.5, 124.6.

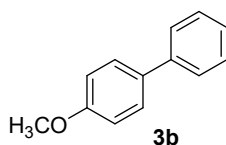

**4-methoxy-1,1'-biphenyl (3b)**<sup>1,2</sup>: Obtained by general procedure, white solid (96% yield),  $^1\text{H}$  NMR (400 MHz,  $\text{CDCl}_3$ )  $\delta$  7.58–7.49 (m, 4H), 7.46–7.37 (m, 2H), 7.36–7.26 (m, 1H), 7.01–6.94 (m, 2H), 3.85 (s, 3H);  $^{13}\text{C}$  NMR (100 MHz,  $\text{CDCl}_3$ )  $\delta$  159.2, 141.1, 134.1, 128.9, 128.3, 126.9, 126.7, 114.7, 55.4.

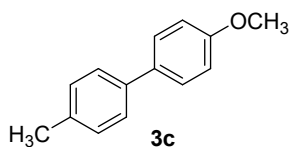

**4-methoxy-4'-methyl-1,1'-biphenyl (3c)**<sup>2</sup>: Obtained by general procedure, white solid (90% yield),  $^1\text{H}$  NMR (400 MHz,  $\text{CDCl}_3$ )  $\delta$  7.54–7.41 (m, 4H), 7.22 (dd,  $J = 8.4, 0.6$  Hz, 2H), 6.99–6.93 (m, 2H), 3.84 (s, 3H), 2.38 (s, 3H);  $^{13}\text{C}$  NMR (100 MHz,  $\text{CDCl}_3$ )  $\delta$  159.2, 138.0, 136.7, 134.1, 130.2, 128.4, 127.0, 114.7, 55.8, 21.5.

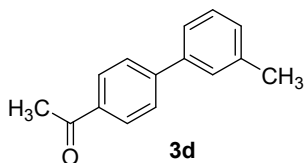

**1-(3'-methyl-[1,1'-biphenyl]-4-yl)ethan-1-one (3d)**<sup>3</sup>: Obtained by general procedure, white solid (85% yield),  $^1\text{H}$  NMR (400 MHz,  $\text{CDCl}_3$ )  $\delta$  8.04–7.99 (m, 2H), 7.70–7.64 (m, 2H), 7.41 (dd,  $J = 4.6, 4.1$  Hz, 2H), 7.35 (t,  $J = 7.5$  Hz, 1H), 7.21 (dd,  $J = 4.3, 3.7$  Hz, 1H), 2.62 (s, 3H), 2.43 (s, 3H);  $^{13}\text{C}$  NMR (100 MHz,  $\text{CDCl}_3$ )  $\delta$  198.3, 146.1, 140.0, 138.7, 135.8, 129.0, 128.2, 128.1, 127.4, 124.5, 124.4, 26.7, 21.9.

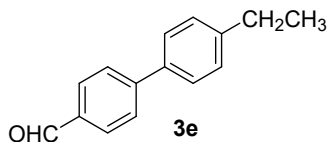

**4'-ethyl-[1,1'-biphenyl]-4-carbaldehyde (3e)**<sup>4</sup>: Obtained by general procedure, white solid (92% yield), <sup>1</sup>H NMR (400 MHz, CDCl<sub>3</sub>) δ 10.03 (s, 1H), 7.95–7.90 (m, 2H), 7.76–7.71 (m, 2H), 7.60–7.53 (m, 2H), 7.34–7.28 (m, 2H), 2.80–2.61 (m, 2H), 1.31–1.21 (m, 3H); <sup>13</sup>C NMR (100 MHz, CDCl<sub>3</sub>) δ 192.1, 147.3, 145.0, 137.1, 135.1, 130.4, 128.6, 127.5, 127.4, 28.6, 15.8.

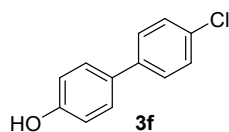

**4'-chloro-[1,1'-biphenyl]-4-ol (3f)**<sup>5</sup>: Obtained by general procedure, white solid (80% yield), <sup>1</sup>H NMR (400 MHz, CDCl<sub>3</sub>) δ 7.49–7.32 (m, 6H), 6.93–6.86 (m, 2H), 4.94 (s, 1H); <sup>13</sup>C NMR (100 MHz, CDCl<sub>3</sub>) δ 155.2, 139.4, 132.9, 132.8, 129.0, 128.4, 128.1, 116.0.

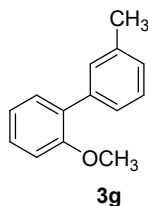

**2-methoxy-3'-methyl-1,1'-biphenyl (3g)**<sup>3a</sup>: Obtained by general procedure, white solid (65% yield), <sup>1</sup>H NMR (400 MHz, CDCl<sub>3</sub>) δ 7.44–7.33 (m, 5H), 7.24–7.18 (m, 1H), 7.11–7.01 (m, 2H), 3.85 (d, *J* = 1.3 Hz, 3H), 2.46 (s, 3H); <sup>13</sup>C NMR (100 MHz, CDCl<sub>3</sub>) δ 156.7, 138.7, 137.7, 131.0, 130.4, 130.3, 128.8, 128.0, 120.9, 111.2, 56.3, 21.9.

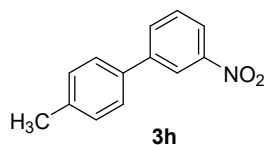

**4'-methyl-3-nitro-1,1'-biphenyl (3h)**<sup>6</sup>: Obtained by general procedure, white solid (63% yield), <sup>1</sup>H NMR (400 MHz, CDCl<sub>3</sub>) δ 8.44–8.41 (m, 1H), 8.18–8.14 (m, 1H), 7.91–7.86 (m, 1H), 7.61–7.49 (m, 3H), 7.31–7.27 (m, 2H), 2.41 (s, 3H); <sup>13</sup>C NMR (100 MHz, CDCl<sub>3</sub>) δ 148.8, 142.9, 138.7, 135.8, 133.0, 130.0, 129.9, 129.7, 127.1, 121.8, 21.3.

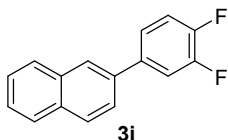

**2-(3,4-difluorophenyl)naphthalene (3i)**<sup>7</sup>: Obtained by general procedure, white solid (74% yield), <sup>1</sup>H NMR (400 MHz, CDCl<sub>3</sub>) δ 7.96 (s, 1H), 7.93–7.80 (m, 3H), 7.64 (dd, *J* = 8.5, 1.7 Hz, 1H), 7.56–7.38 (m, 4H), 7.31–7.18 (m, 1H); <sup>13</sup>C NMR (100 MHz, CDCl<sub>3</sub>) δ 151.5, 149.5, 138.4, 136.6, 132.8, 128.8, 128.4, 127.9, 126.68 (d, *J*<sub>C-F</sub> = 25.0 Hz), 126.43, 125.9, 125.1, 123.4; <sup>19</sup>F NMR (376 MHz, CDCl<sub>3</sub>) δ -137.34(s), -140.01(s).

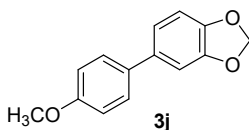

**5-(4-methoxyphenyl)benzo[1,3]dioxole (3j)**<sup>8</sup>: Obtained by general procedure, white solid (91% yield), <sup>1</sup>H NMR (400 MHz, CDCl<sub>3</sub>) δ 7.48–7.39 (m, 2H), 7.04–6.91 (m, 4H), 6.88–6.82 (m, 1H), 6.01–5.94 (m, 2H), 3.83 (s, 3H); <sup>13</sup>C NMR (100 MHz, CDCl<sub>3</sub>) δ 159.0, 148.2, 146.7, 135.4, 133.8, 127.9, 120.3, 114.3, 108.7, 107.5, 101.1, 55.8.

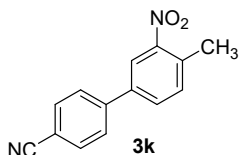

**4'-methyl-3'-nitro-[1,1'-biphenyl]-4-carbonitrile (3k)**<sup>9</sup>: Obtained by general procedure, white solid (68% yield), <sup>1</sup>H NMR (600 MHz, CDCl<sub>3</sub>) δ 7.92–7.83 (m, 1H), 7.48–7.32 (m, 5H), 7.13 (dd, *J* = 9.6, 5.3 Hz, 1H), 6.98–6.86 (m, 1H), 2.43–2.28 (m, 3H); <sup>13</sup>C NMR (150 MHz, CDCl<sub>3</sub>) δ 149.4, 142.6, 137.9, 133.6, 133.4, 132.6, 131.0, 127.3, 122.9, 118.2, 111.7, 19.9.

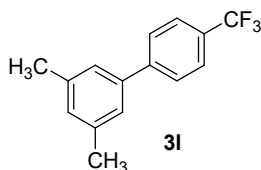

**3,5-dimethyl-4'-(trifluoromethyl)-1,1'-biphenyl (3l)**<sup>10</sup>: Obtained by general procedure, colourless liquid (70% yield), <sup>1</sup>H NMR (400 MHz, CDCl<sub>3</sub>) δ 7.66 (s, 4H), 7.20 (s, 2H), 7.05 (d, *J* = 0.5 Hz, 1H), 2.42–2.36 (m, 6H); <sup>13</sup>C NMR (100 MHz, CDCl<sub>3</sub>) δ 143.2, 138.6, 130.5, 130.1, 129.8, 127.6, 127.4, 125.2, 122.77 (*J*<sub>C-F</sub> = 270 Hz), 120.07, 21.4; <sup>19</sup>F NMR (377 MHz, CDCl<sub>3</sub>) δ -62.6.

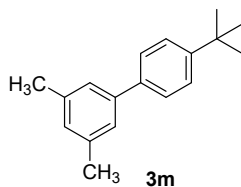

**4'-(tert-butyl)-3,5-dimethyl-1,1'-biphenyl (3m)**<sup>11</sup>: Obtained by general procedure, colourless liquid (68% yield), <sup>1</sup>H NMR (500 MHz, CDCl<sub>3</sub>) δ 7.63–7.59 (m, 2H), 7.55–7.52 (m, 2H), 7.29 (d, *J* = 6.8 Hz, 2H), 7.06 (s, 1H), 2.46 (s, 6H), 1.45 (s, 9H); <sup>13</sup>C NMR (125 MHz, CDCl<sub>3</sub>) δ 150.0, 141.1, 138.1, 128.6, 126.8, 126.6, 125.5, 124.9, 34.4, 31.3, 21.4.

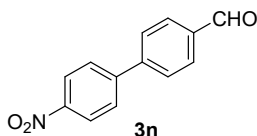

**4'-nitro-[1,1'-biphenyl]-4-carbaldehyde (3n)**<sup>12</sup>: Obtained by general procedure, white solid (86% yield), <sup>1</sup>H NMR (500 MHz, CDCl<sub>3</sub>) δ 10.11 (s, 1H), 8.35 (d, *J* = 8.9 Hz, 2H), 8.03 (d, *J* = 8.4 Hz, 2H), 7.83–7.77 (m, 4H); <sup>13</sup>C NMR (125 MHz, CDCl<sub>3</sub>) δ 191.5, 147.7, 145.9, 144.4, 136.2, 130.3, 128.1, 128.0, 124.2.

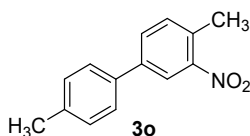

**4,4'-dimethyl-3-nitro-1,1'-biphenyl (3o)**<sup>13</sup>: Obtained by general procedure, white solid (64% yield), <sup>1</sup>H NMR (500 MHz, CDCl<sub>3</sub>) δ 8.21 (d, *J* = 1.9 Hz, 1H), 7.73 (dd, *J* = 7.9, 1.9 Hz, 1H), 7.54–7.49 (m, 2H), 7.39 (dd, *J* = 11.7, 4.6 Hz, 1H), 7.30 (dd, *J* = 10.8, 3.0 Hz, 2H), 2.65 (s, 3H), 2.44 (s, 3H); <sup>13</sup>C NMR (125 MHz, CDCl<sub>3</sub>) δ 149.5, 140.1, 138.1, 135.5, 133.1, 131.8, 131.0, 129.7, 126.6, 122.6, 21.0, 20.0.

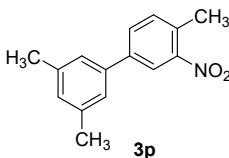

**3',4,5'-trimethyl-3-nitro-1,1'-biphenyl (3p)**: Obtained by general procedure, colourless liquid (61% yield), <sup>1</sup>H NMR (500 MHz, CDCl<sub>3</sub>) δ 8.22 (d, *J* = 1.9 Hz, 1H), 7.73 (dd, *J* = 7.9, 2.0 Hz, 1H), 7.40 (d, *J* = 8.0 Hz, 1H), 7.24 (s, 2H), 7.08–7.05 (m, 1H), 2.66 (s, 3H), 2.42 (s, 6H); <sup>13</sup>C NMR (125 MHz, CDCl<sub>3</sub>) δ 149.4, 140.5, 138.6, 138.4, 133.0, 131.9, 131.2, 129.8, 124.7, 122.8, 21.3, 20.0. Anal. for C<sub>15</sub>H<sub>15</sub>NO<sub>2</sub>, calcd C, 74.67; H, 6.27; N, 5.81; found C, 74.16; H, 6.37; N, 5.39.

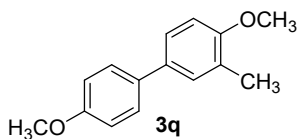

**4,4'-dimethoxy-3-methyl-1,1'-biphenyl (3q)**<sup>14</sup>: Obtained by general procedure, white solid (68% yield), <sup>1</sup>H NMR (500 MHz, CDCl<sub>3</sub>) δ 7.55–7.48 (m, 2H), 7.38 (dd, *J* = 6.0, 2.2 Hz, 2H), 7.02–6.97 (m, 2H), 6.94–6.88 (m, 1H), 3.90 (s, 3H), 3.88 (s, 3H), 2.32 (s, 3H); <sup>13</sup>C NMR (125 MHz, CDCl<sub>3</sub>) δ 158.5, 156.8, 133.6, 133.0, 129.1, 127.6, 126.7, 124.8, 114.0, 110.1, 55.3, 55.2, 16.3.

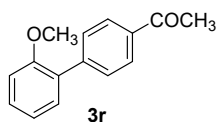

**1-(2'-methoxy-[1,1'-biphenyl]-4-yl)ethan-1-one (3r)**<sup>15</sup>: Obtained by general procedure, white solid (64% yield), <sup>1</sup>H NMR (500 MHz, CDCl<sub>3</sub>) δ 8.08–7.99 (m, 2H), 7.73–7.62 (m, 2H), 7.46–7.34 (m, 2H), 7.15–6.98 (m, 2H), 3.85 (s, 3H), 2.66 (s, 3H); <sup>13</sup>C NMR (125 MHz, CDCl<sub>3</sub>) δ 197.8, 156.4, 143.5, 135.4, 130.6, 129.6, 129.4, 129.3, 128.0, 120.9, 111.3, 55.5, 26.5.

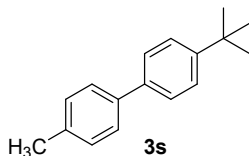

**4-(tert-butyl)-4'-methyl-1,1'-biphenyl (3s)**<sup>15</sup>: Obtained by general procedure, white solid (98% yield), <sup>1</sup>H NMR (500 MHz, CDCl<sub>3</sub>) δ 7.60–7.49 (m, 6H), 7.31–7.26 (m, 2H), 2.44 (s, 3H), 1.42 (s, 9H); <sup>13</sup>C NMR (125 MHz, CDCl<sub>3</sub>) δ 149.8, 138.2, 136.6, 129.3, 126.8, 126.5, 125.6, 125.5, 34.4, 31.3, 21.0.

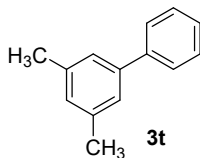

**3,5-dimethyl-1,1'-biphenyl (3t)**<sup>16</sup>: Obtained by general procedure, colourless liquid (84% yield), <sup>1</sup>H NMR (500 MHz, CDCl<sub>3</sub>) δ 7.73 (d, *J* = 7.1 Hz, 2H), 7.60–7.46 (m, 4H), 7.37 (s, 2H), 7.14 (s, 1H), 2.53 (s, 6H); <sup>13</sup>C NMR (125 MHz, CDCl<sub>3</sub>) δ 141.5, 141.3, 138.2, 128.9, 128.7, 127.2, 127.1, 125.1, 21.4.

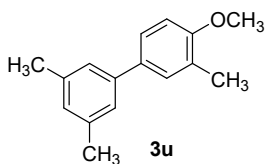

**4-methoxy-3,3',5'-trimethyl-1,1'-biphenyl (3u)**: Obtained by general procedure, colourless liquid (72% yield),  $^1\text{H}$  NMR (500 MHz,  $\text{CDCl}_3$ )  $\delta$  7.49–7.46 (m, 3H), 7.28 (s, 1H), 7.05–6.95 (m, 2H), 3.94 (s, 3H), 2.47 (s, 6H), 2.39(s, 3H);  $^{13}\text{C}$  NMR (125 MHz,  $\text{CDCl}_3$ )  $\delta$  157.2, 138.1, 133.5, 129.5, 129.0, 128.2, 126.7, 125.3, 124.7, 110.0, 55.3, 21.4, 16.3. Anal. for  $\text{C}_{16}\text{H}_{18}\text{O}$ , calcd C, 84.91; H, 8.02; found C, 84.58; H, 8.18.

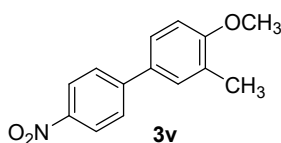

**4-methoxy-3-methyl-4'-nitro-1,1'-biphenyl (3v)**<sup>17</sup>: Obtained by general procedure, white solid (72% yield),  $^1\text{H}$  NMR (500 MHz,  $\text{CDCl}_3$ )  $\delta$  8.31–8.24 (m, 2H), 7.74–7.68 (m, 2H), 7.46 (d,  $J = 5.9$  Hz, 2H), 6.95 (d,  $J = 8.4$  Hz, 1H), 3.92 (s, 3H), 2.32 (s, 3H);  $^{13}\text{C}$  NMR (125 MHz,  $\text{CDCl}_3$ )  $\delta$  158.6, 147.4, 146.3, 130.5, 129.5, 127.4, 126.9, 125.8, 124.0, 110.2, 55.4, 16.3.

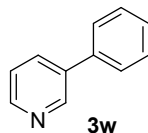

**3-phenylpyridine (3w)**<sup>2</sup>: Obtained by general procedure, colourless liquid (82% yield),  $^1\text{H}$  NMR (400 MHz,  $\text{CDCl}_3$ )  $\delta$  8.87–8.80 (m, 1H), 8.60–8.53 (m, 1H), 7.89–7.82 (m, 1H), 7.59–7.53 (m, 2H), 7.49–7.30 (m, 4H);  $^{13}\text{C}$  NMR (125 MHz,  $\text{CDCl}_3$ )  $\delta$  148.5, 148.4, 137.9, 136.8, 134.5, 129.3, 128.2, 127.2, 123.8.

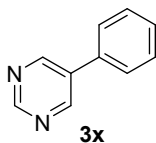

**5-phenylpyrimidine (3x)**<sup>1</sup>: Obtained by general procedure, colourless liquid (74% yield),  $^1\text{H}$  NMR (400 MHz,  $\text{CDCl}_3$ )  $\delta$  9.20–9.16 (m, 1H), 8.93 (d,  $J = 3.3$  Hz, 2H), 7.58–7.54 (m, 2H), 7.52–7.42 (m, 3H);  $^{13}\text{C}$  NMR (125 MHz,  $\text{CDCl}_3$ )  $\delta$  157.6, 157.5, 155.0, 134.4, 134.3, 129.6, 129.1, 127.1.



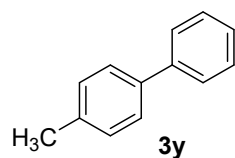

**4-methyl-1,1'-biphenyl (3y)**<sup>1,2</sup>: Obtained by general procedure, white solid (81% yield), <sup>1</sup>H NMR (500 MHz, CDCl<sub>3</sub>) δ 7.66–7.61 (m, 2H), 7.55 (d, *J* = 8.1 Hz, 2H), 7.48 (dd, *J* = 10.6, 4.8 Hz, 2H), 7.40–7.35 (m, 1H), 7.32–7.28 (m, 2H), 2.45 (s, 3H); <sup>13</sup>C NMR (125 MHz, CDCl<sub>3</sub>) δ 141.1, 138.3, 136.9, 129.4, 128.6, 126.9, 126.8, 21.0.

# $^1\text{H}$ and $^{13}\text{C}$ NMR spectra

3a.

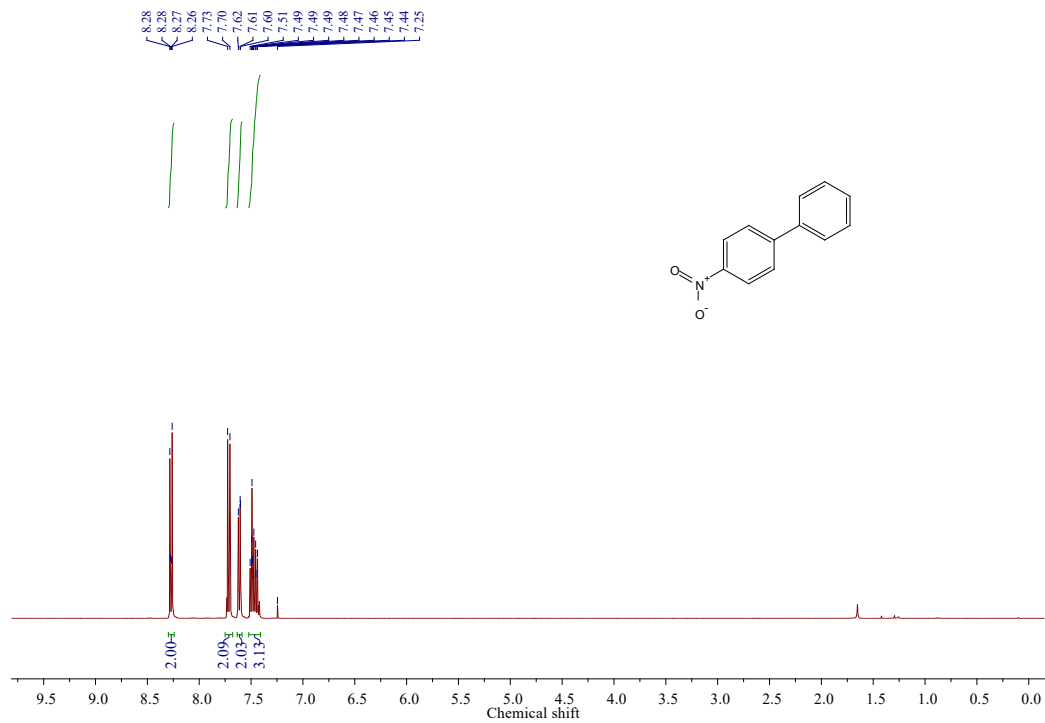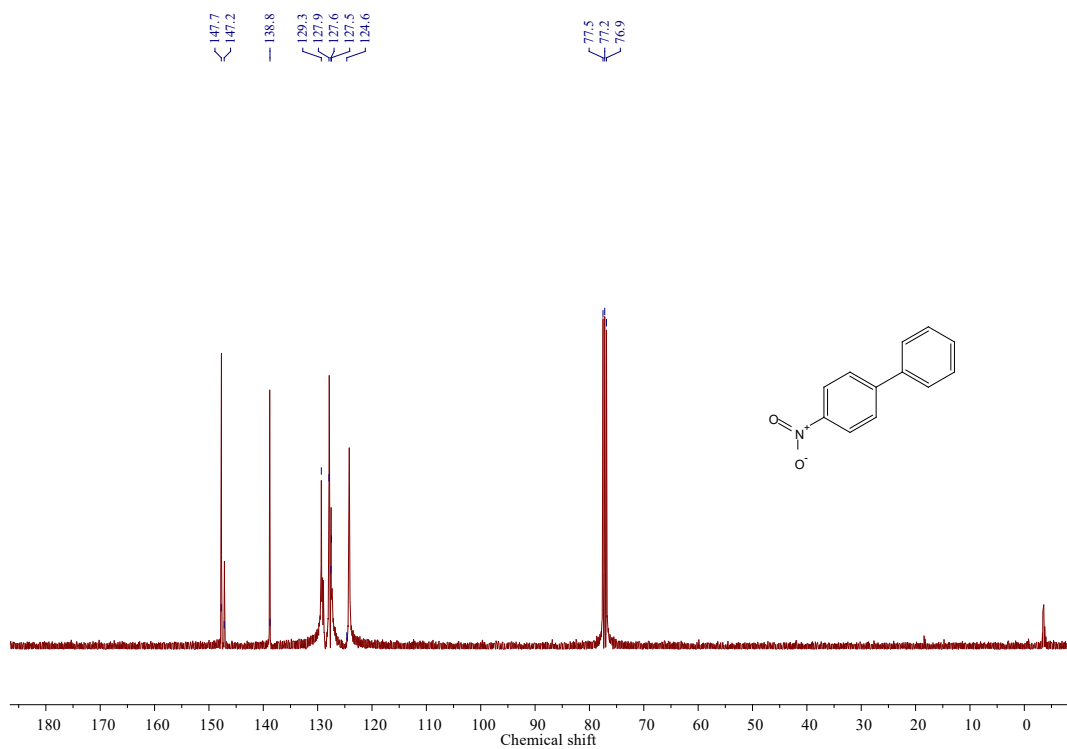

3b.

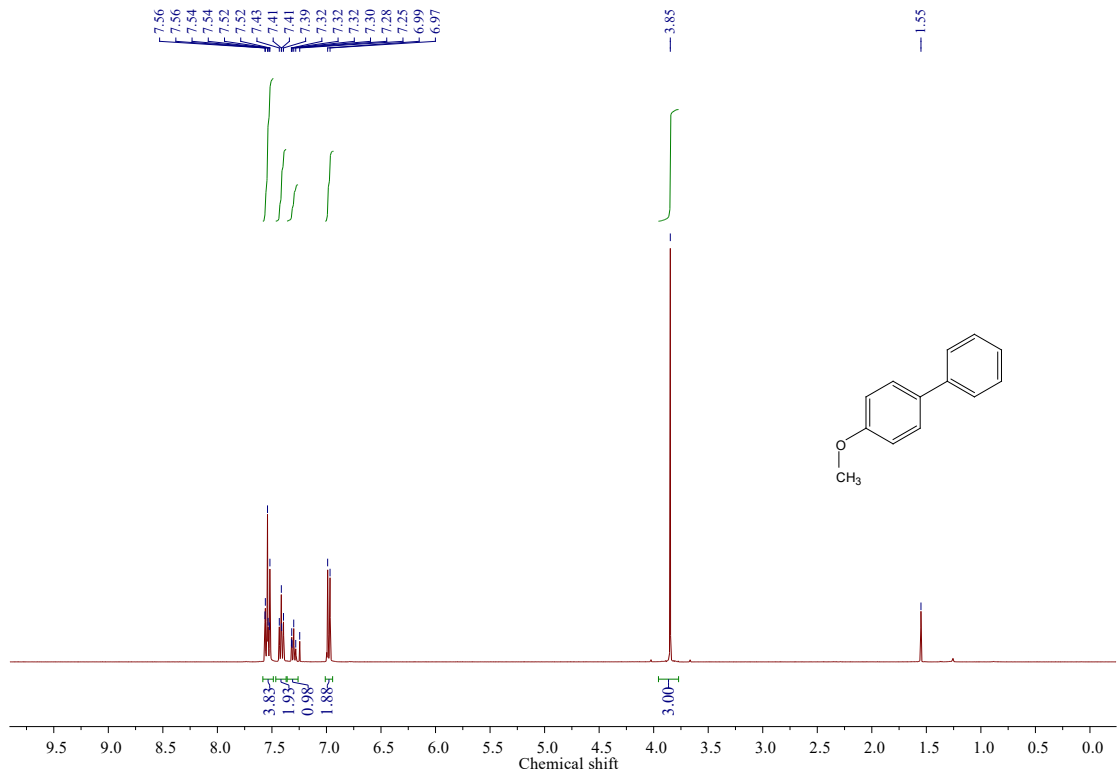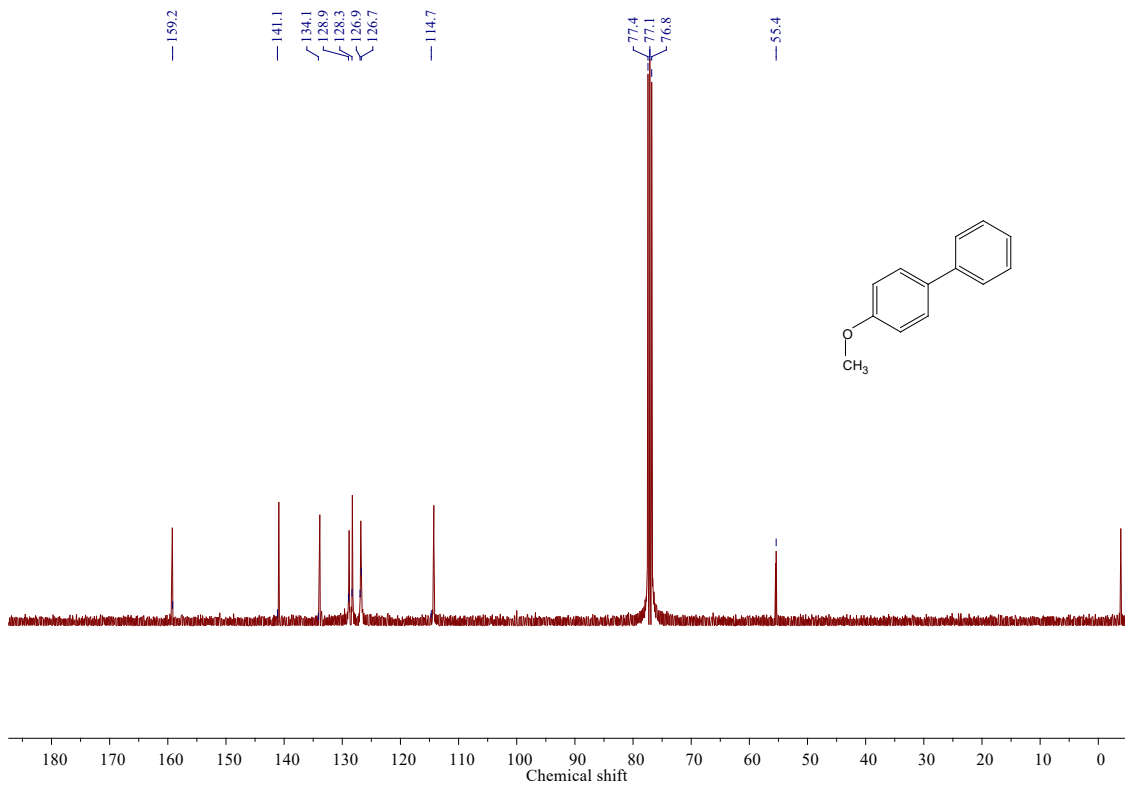

3c.

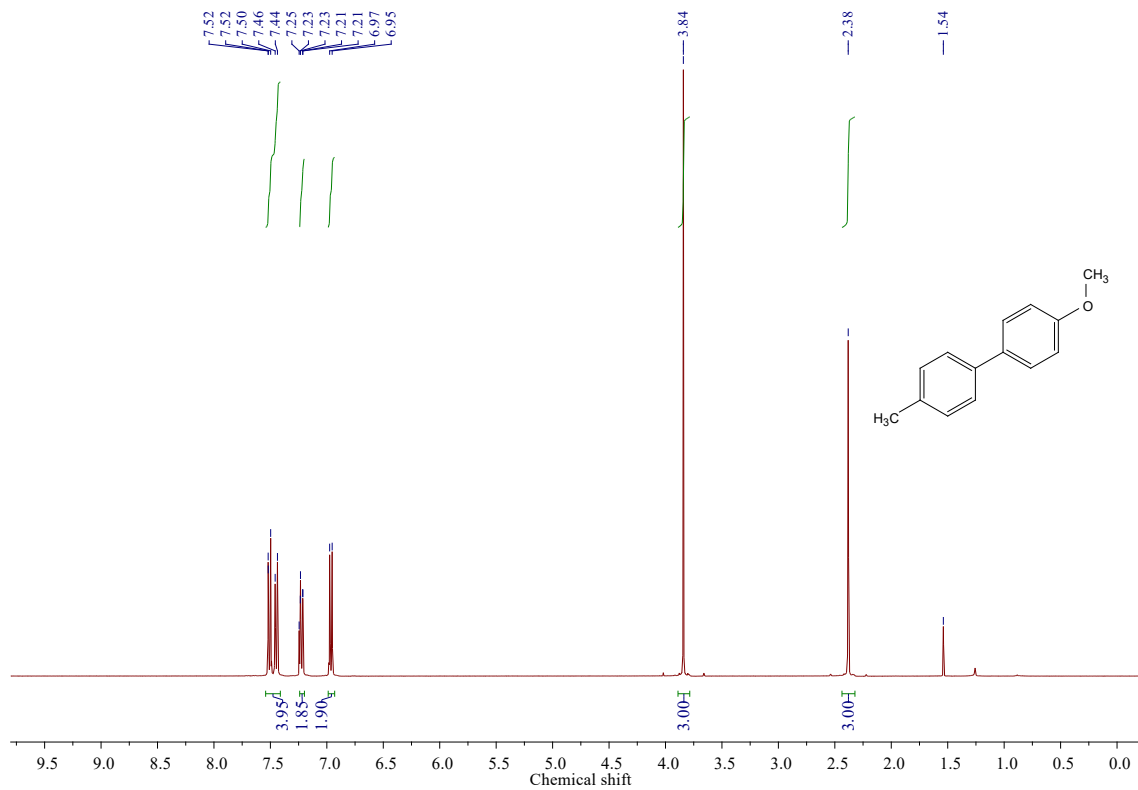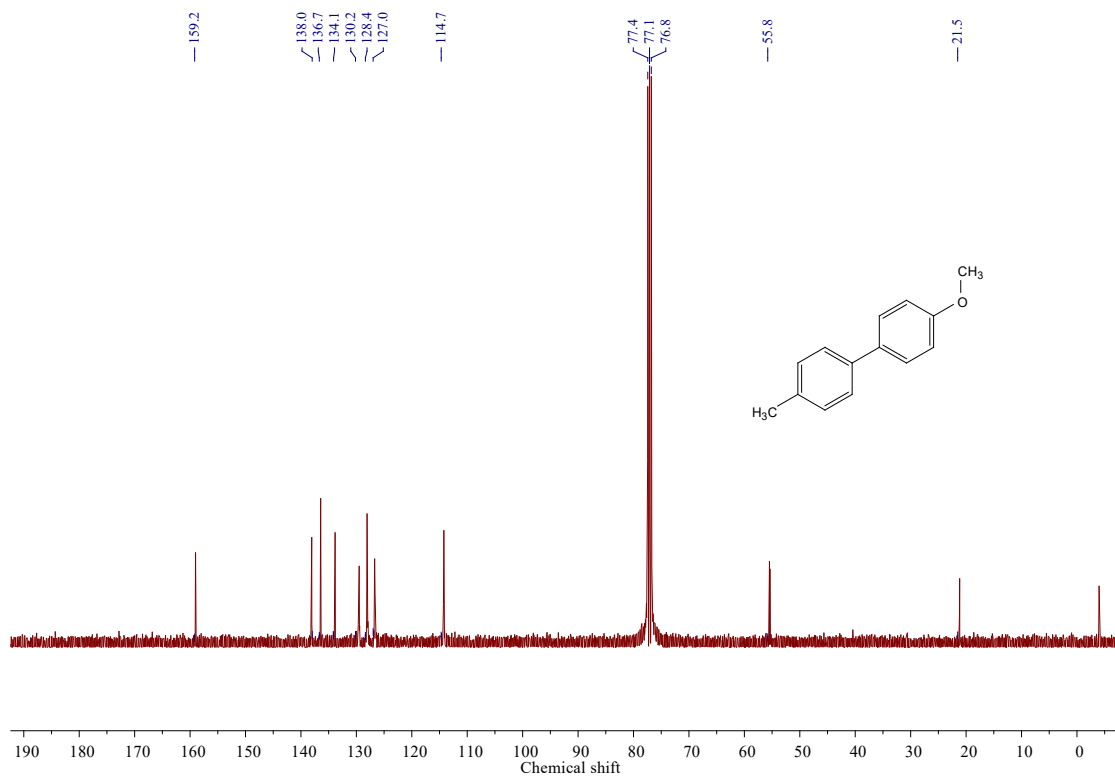

3d.

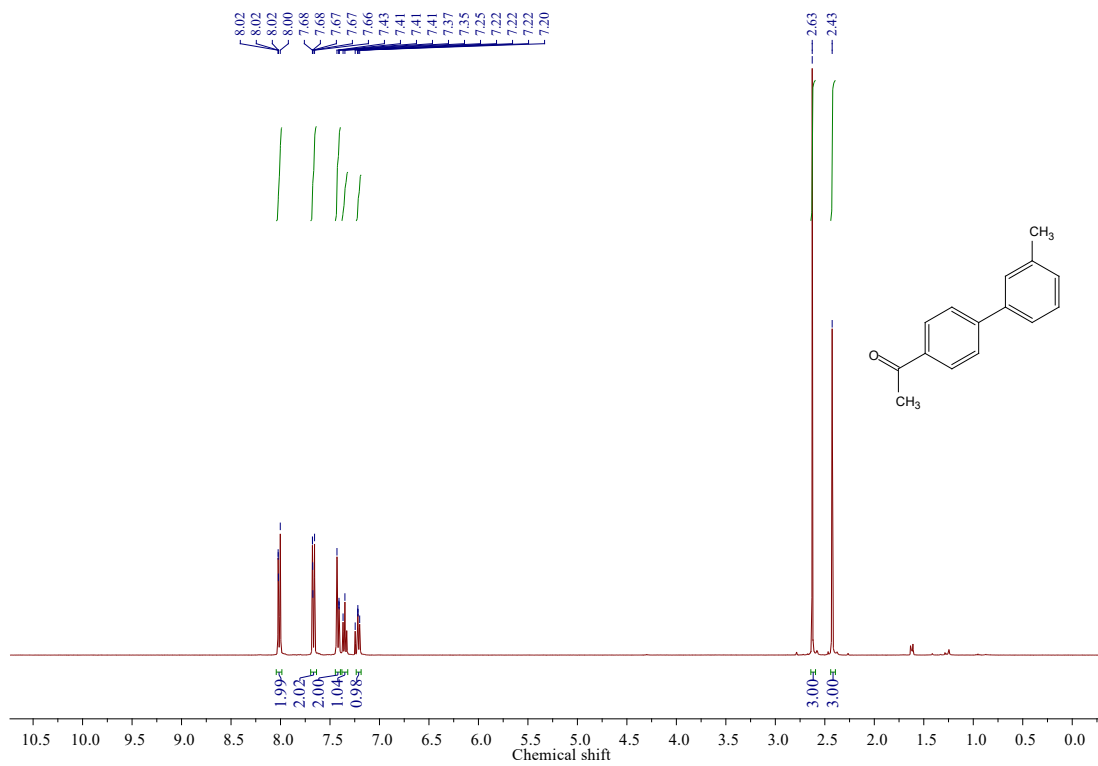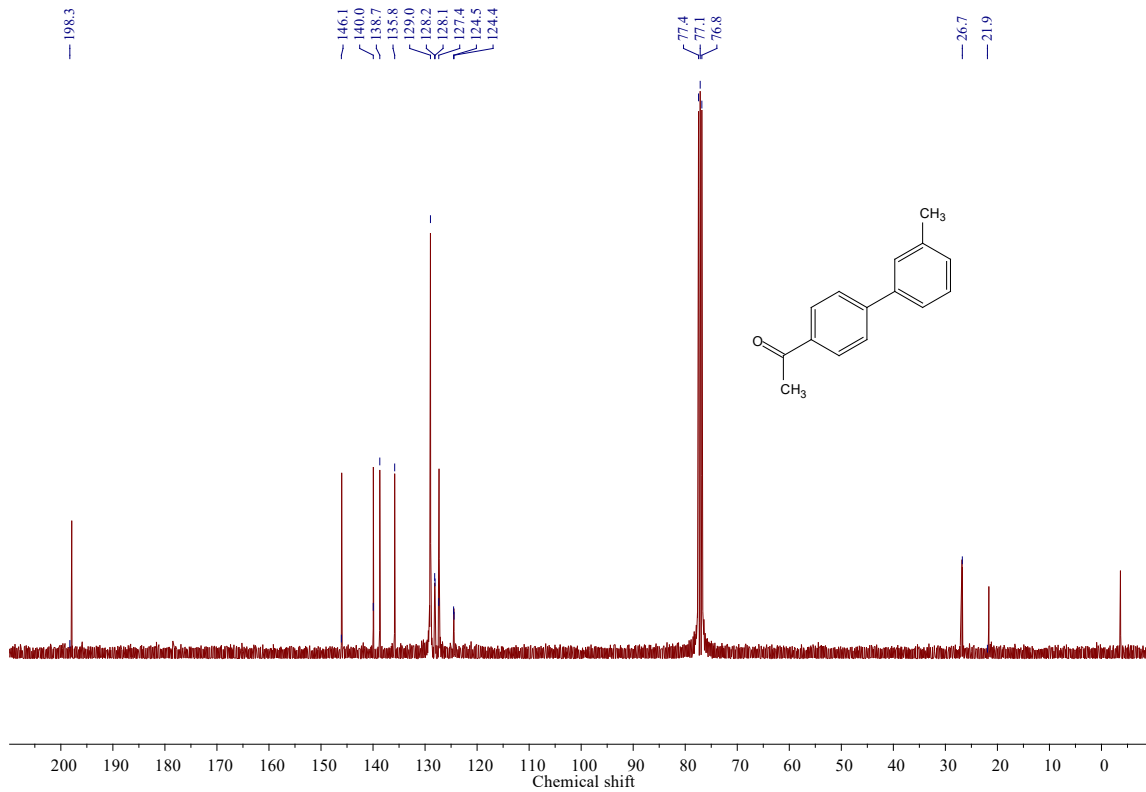

3e.

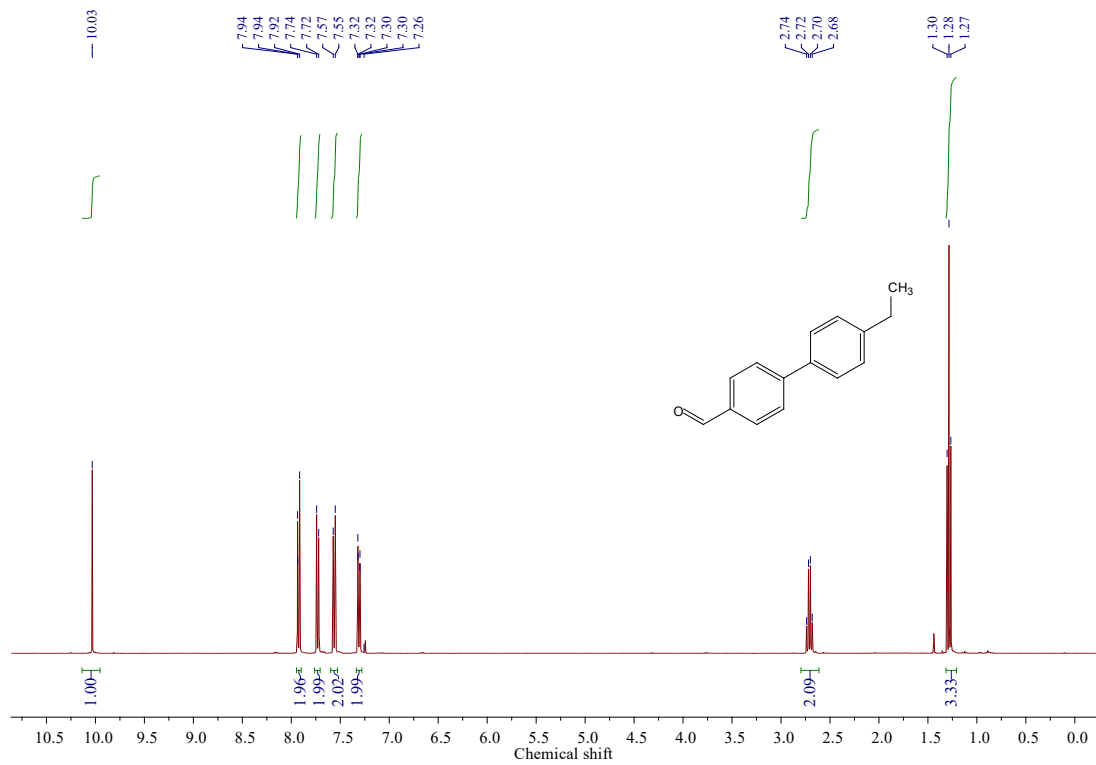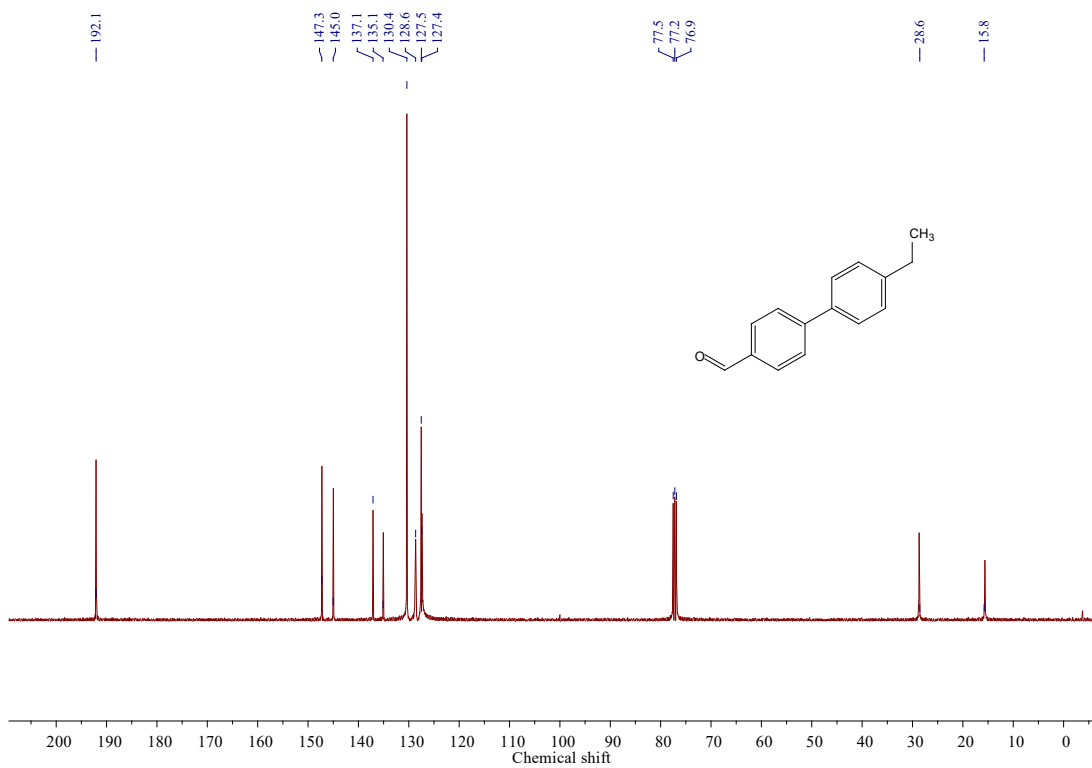

3f.

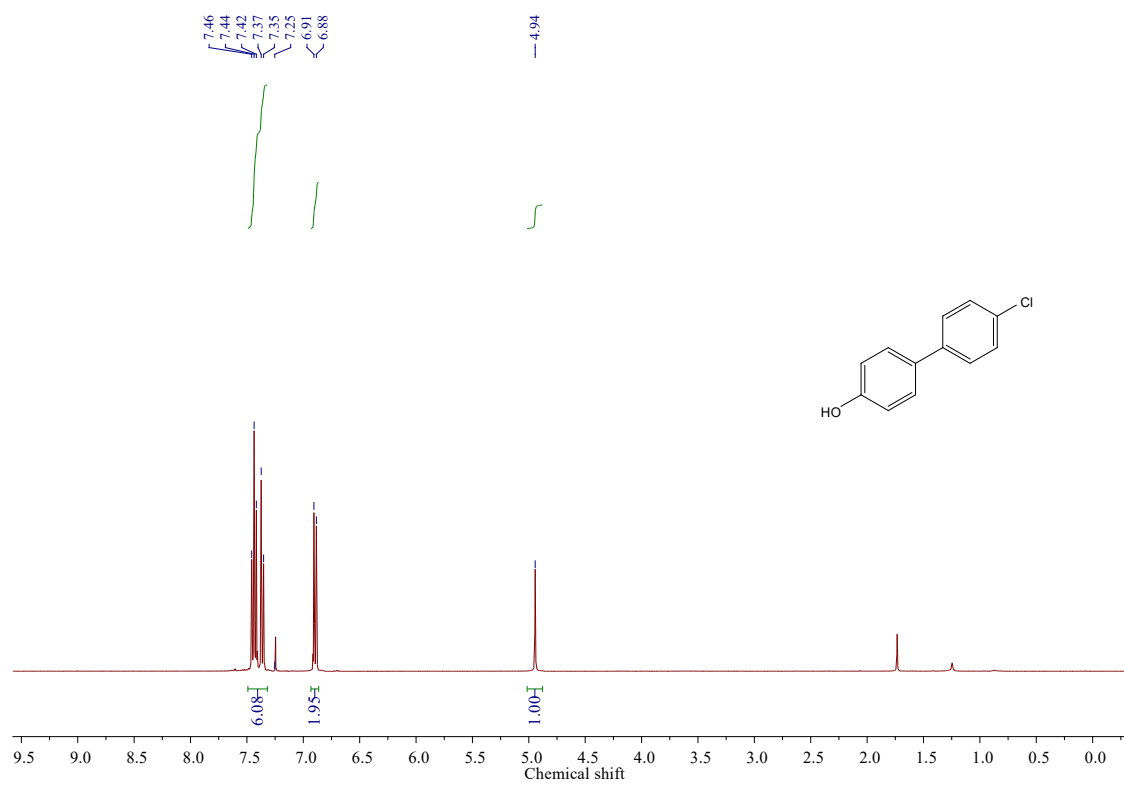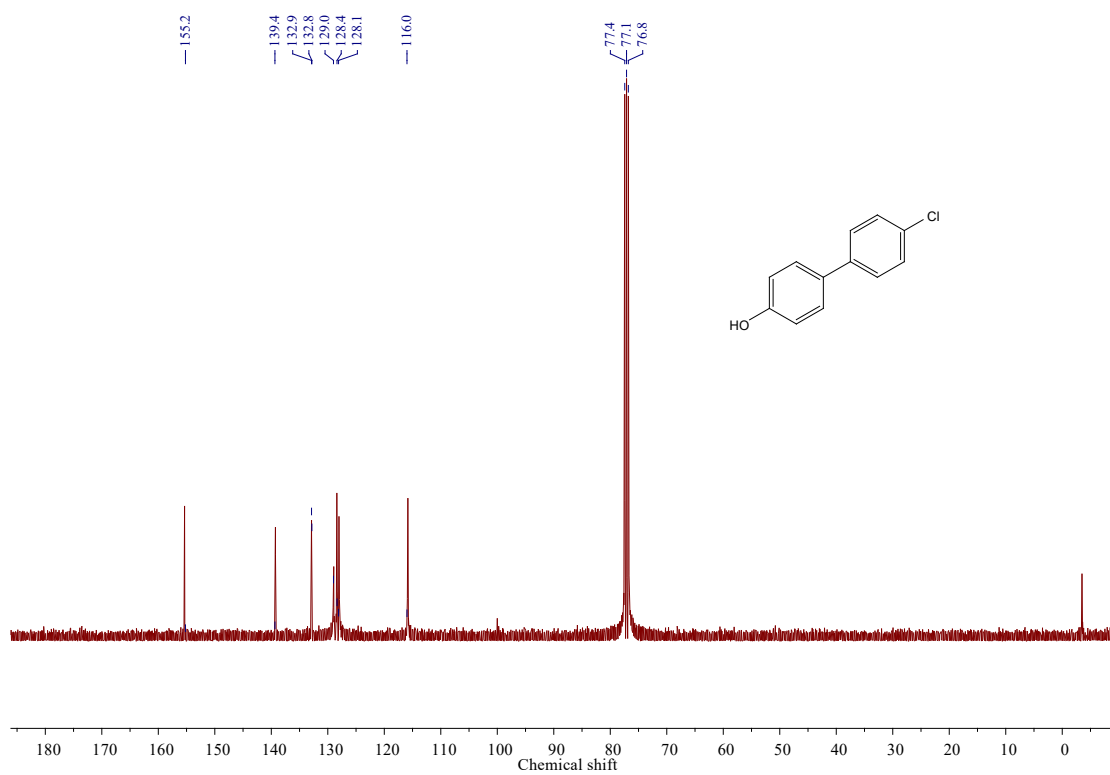

3g.

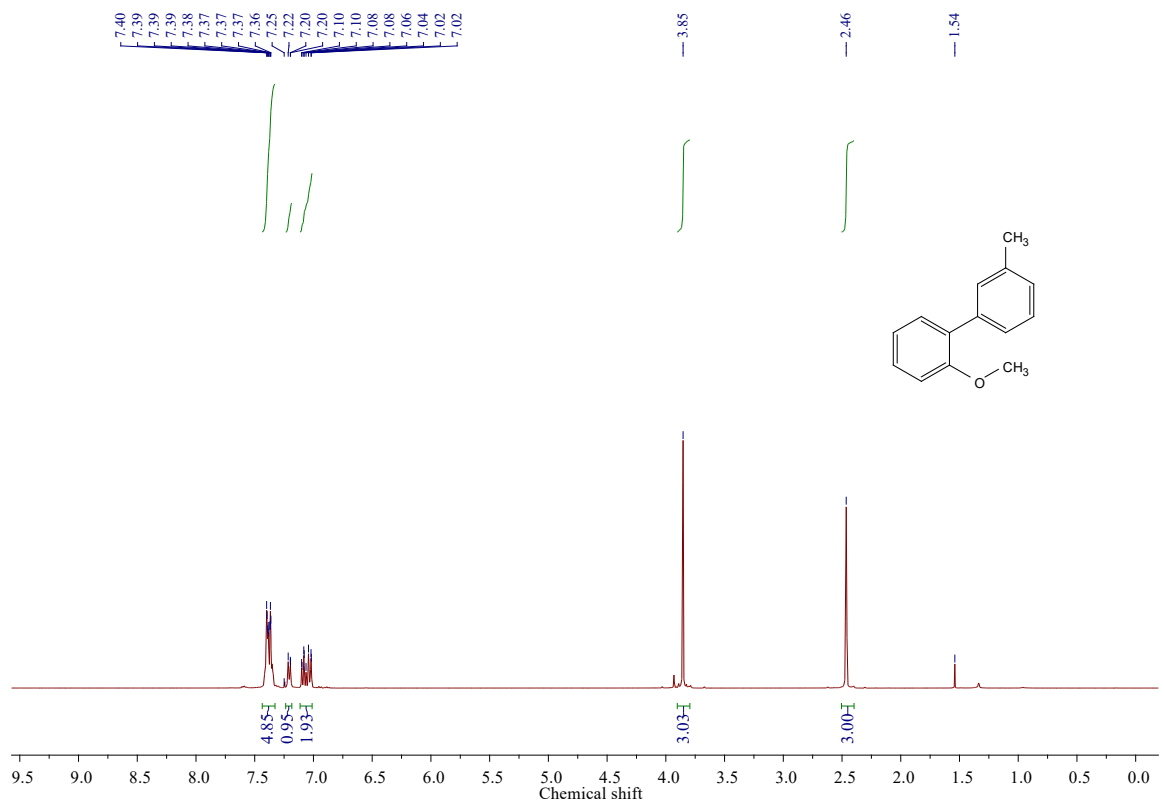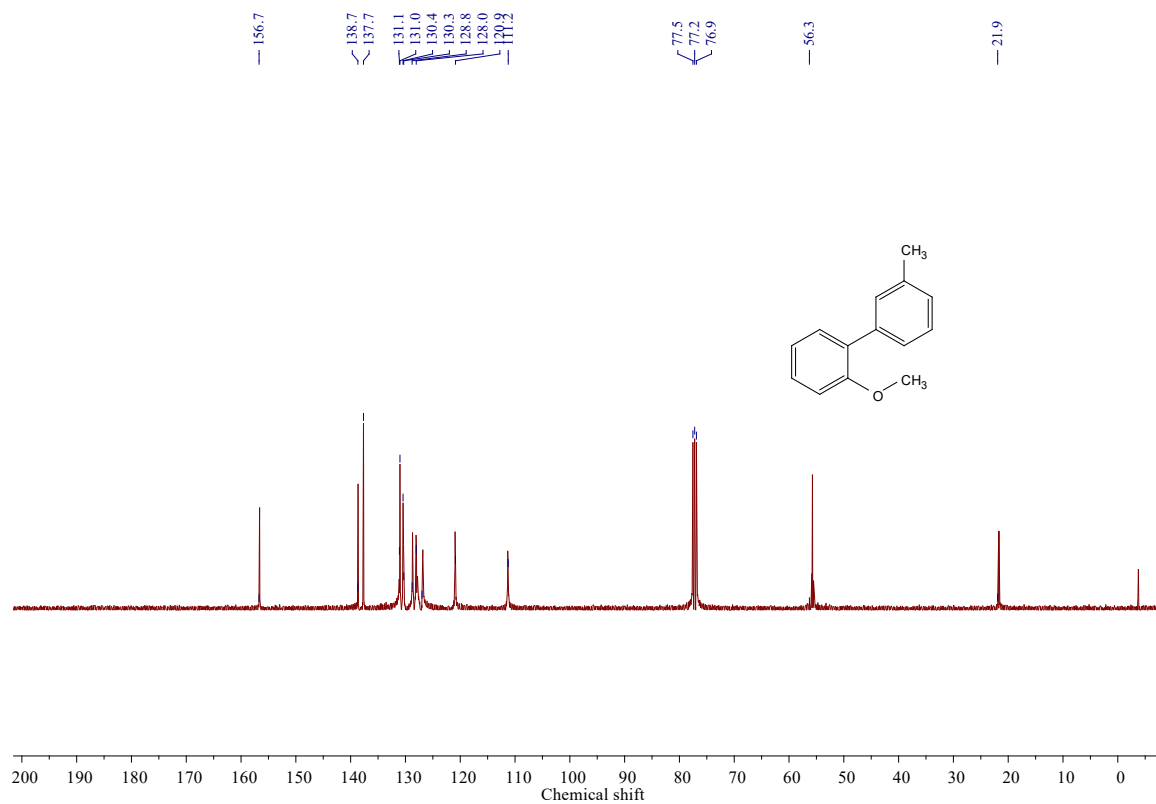



3h.

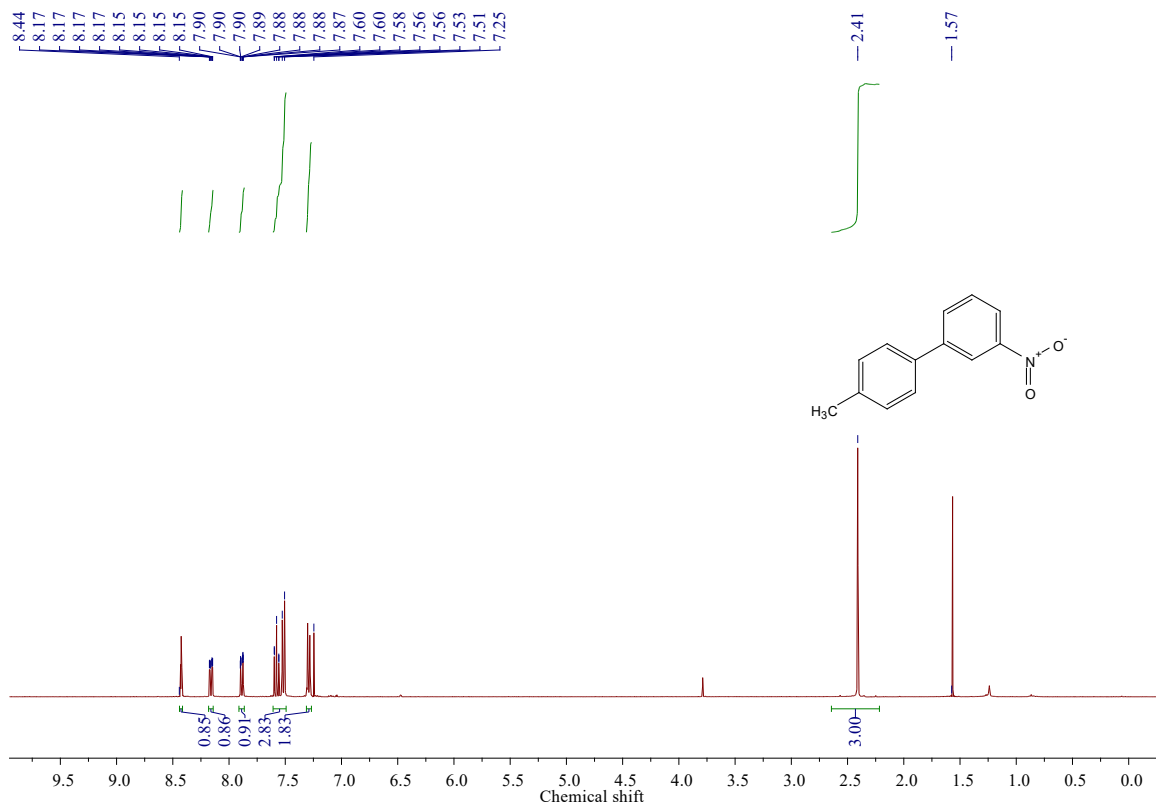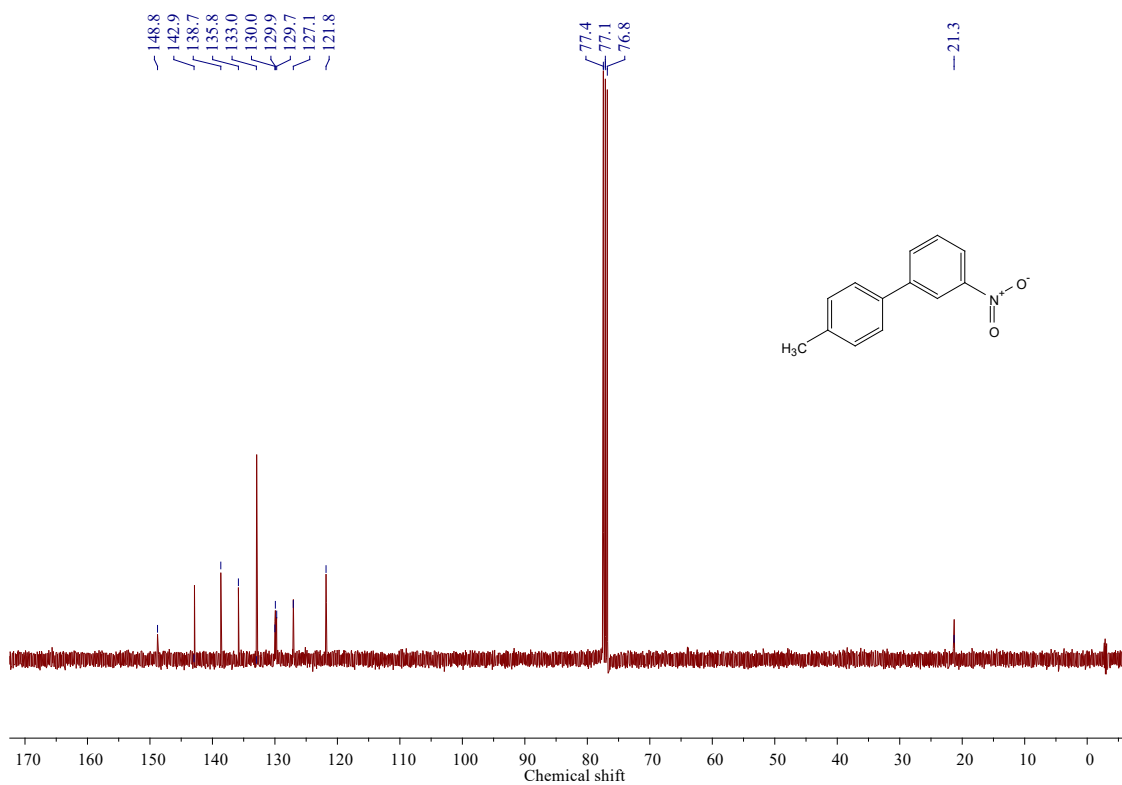

3i.

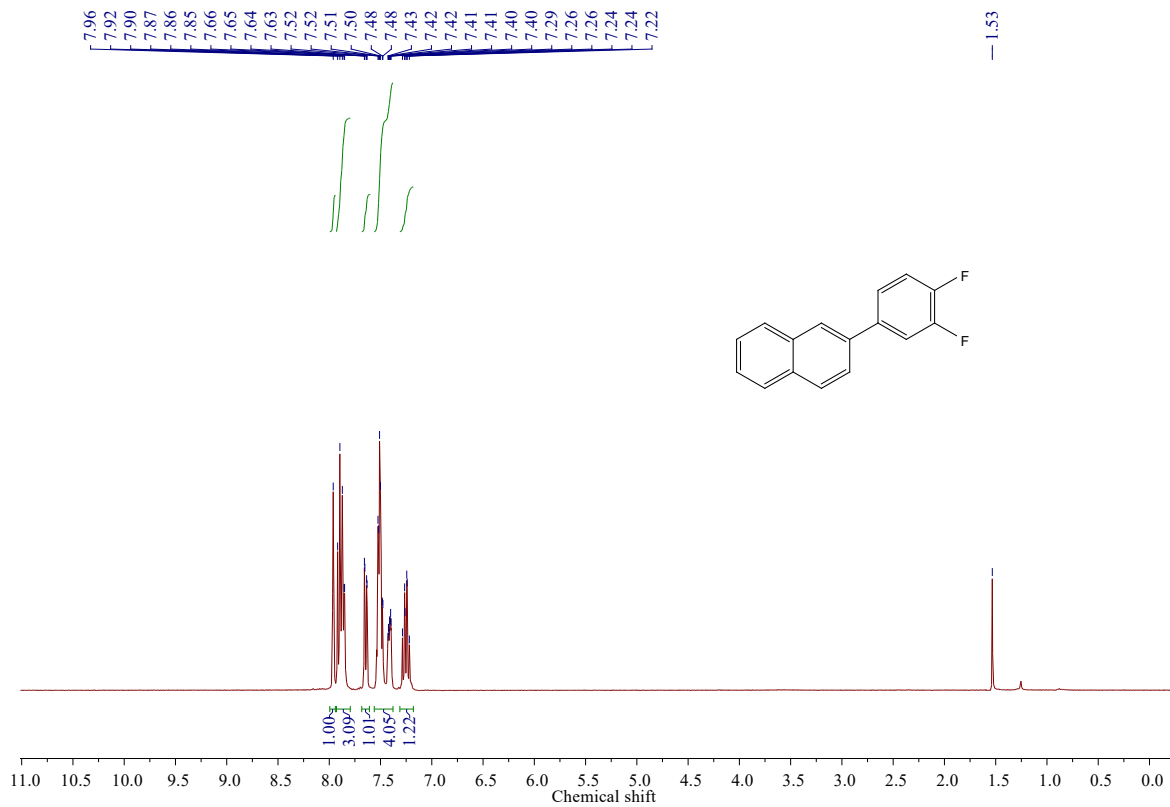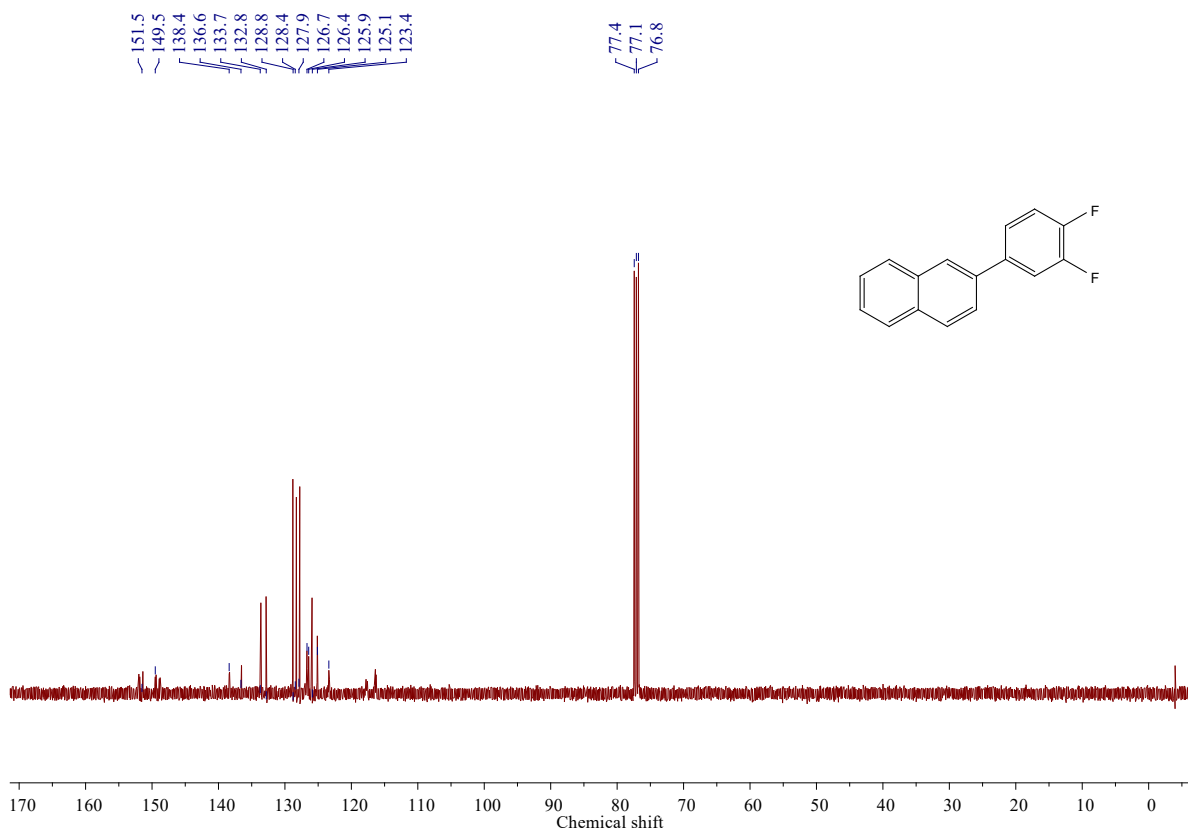

3j.

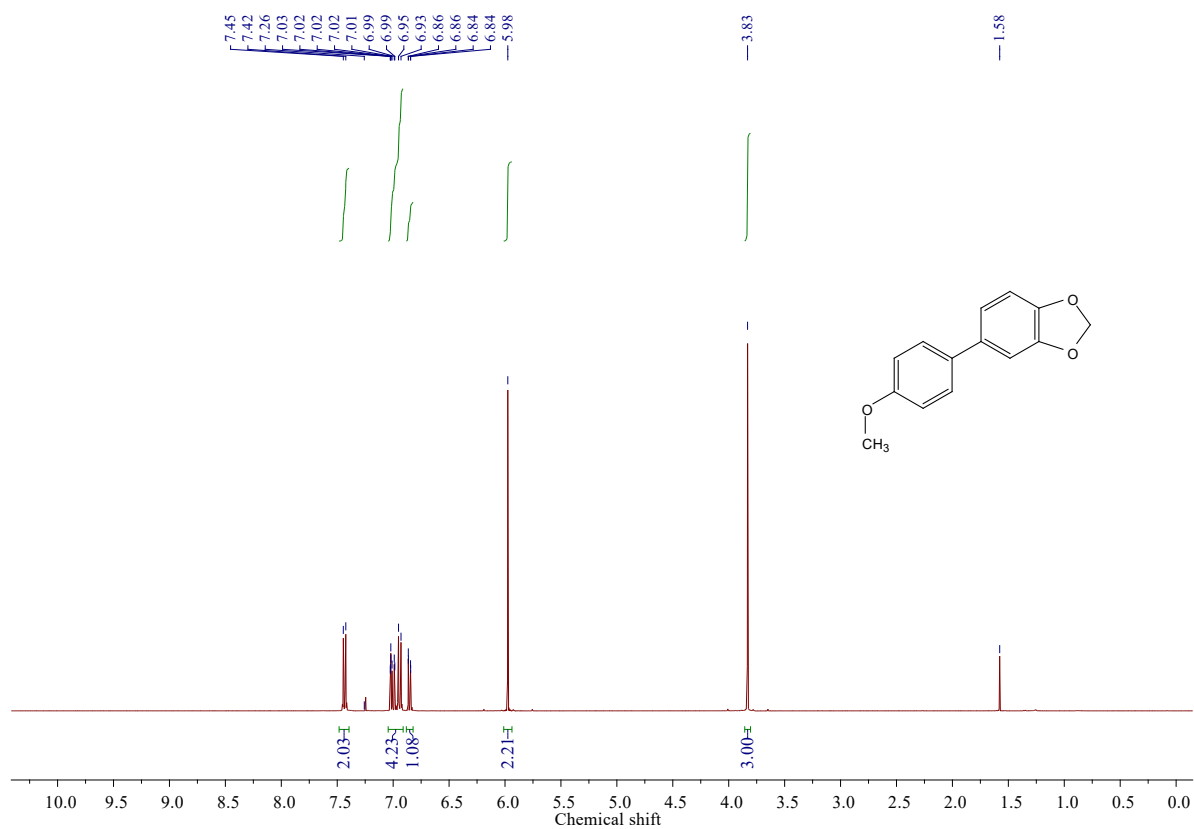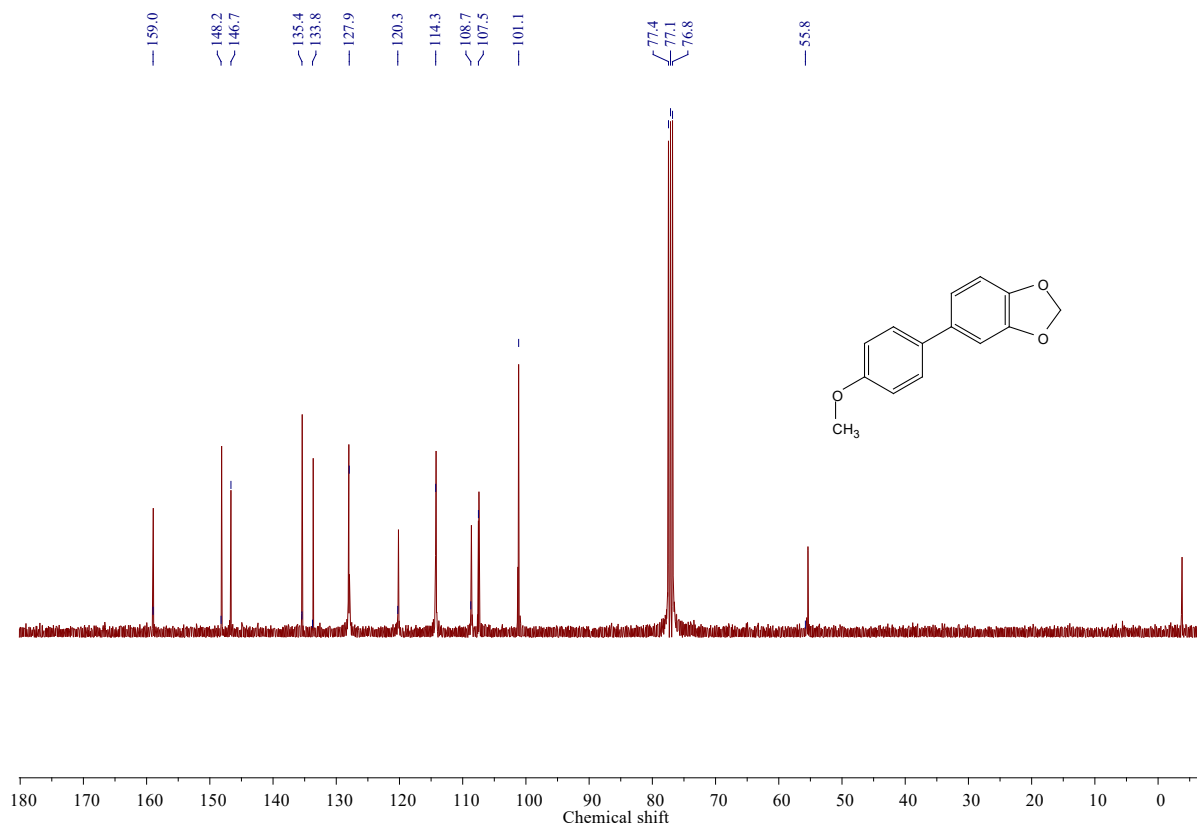

3k.

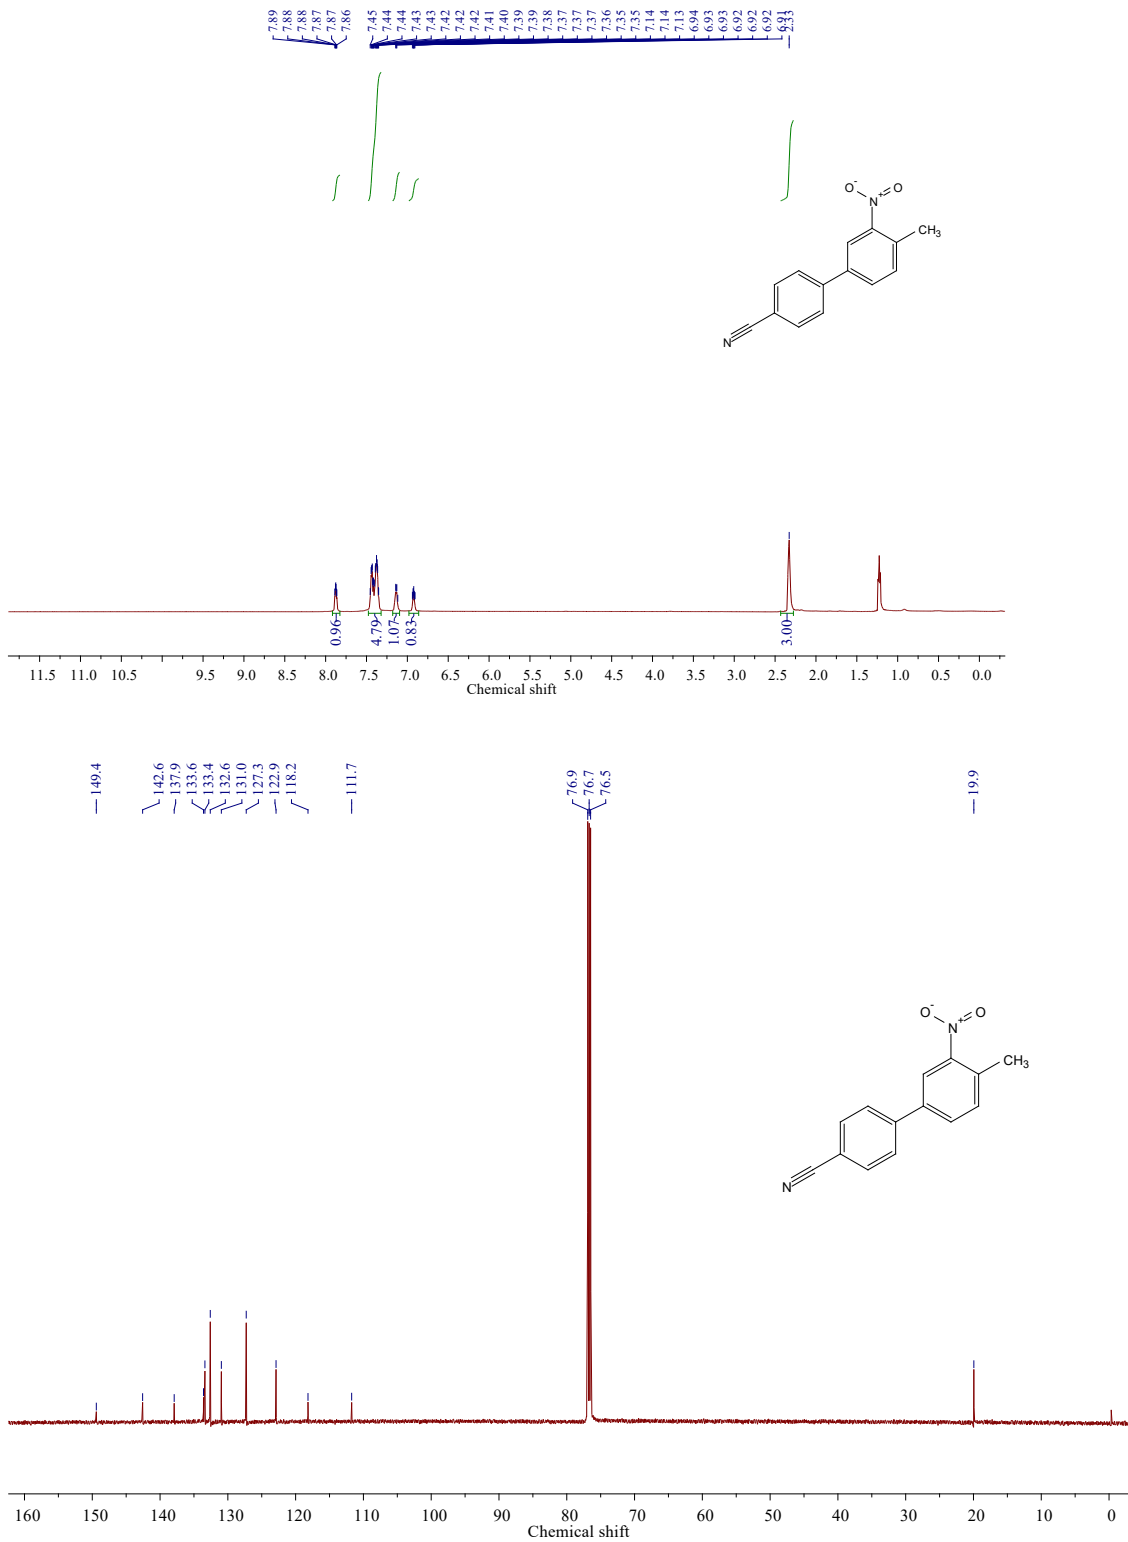

31.

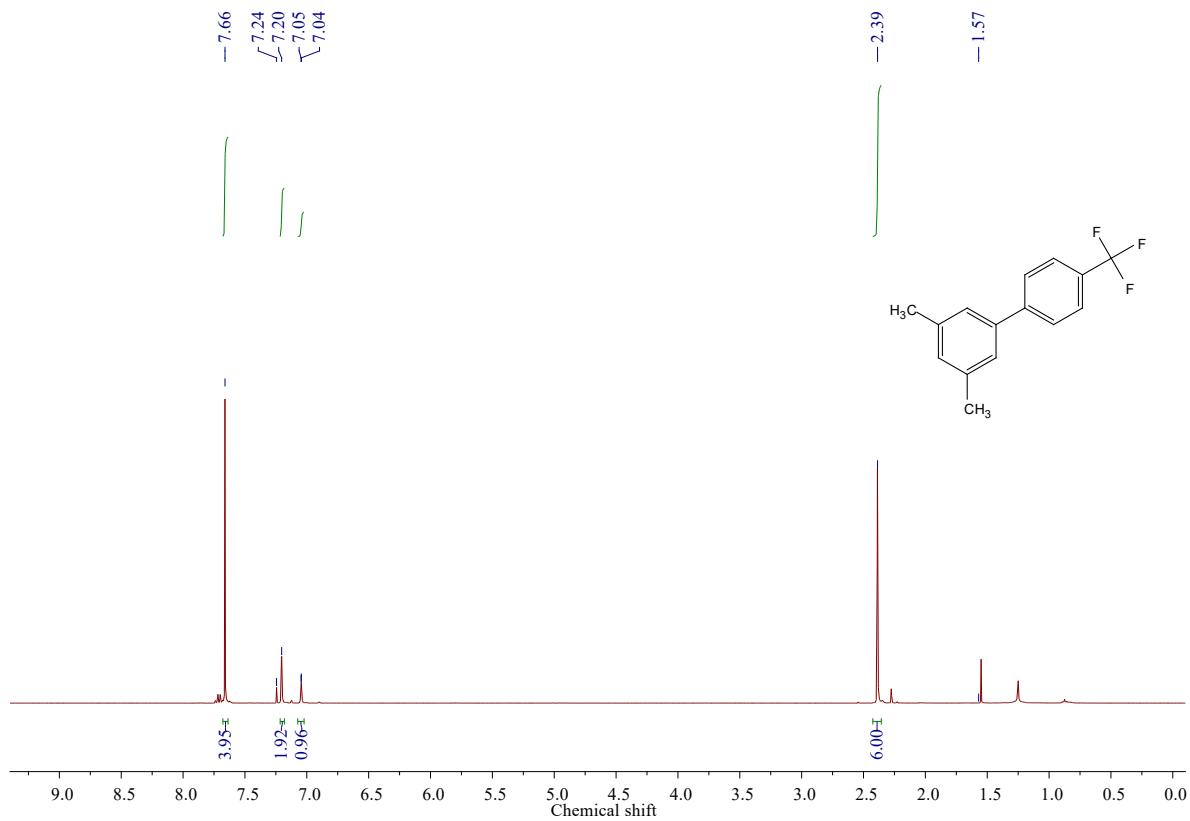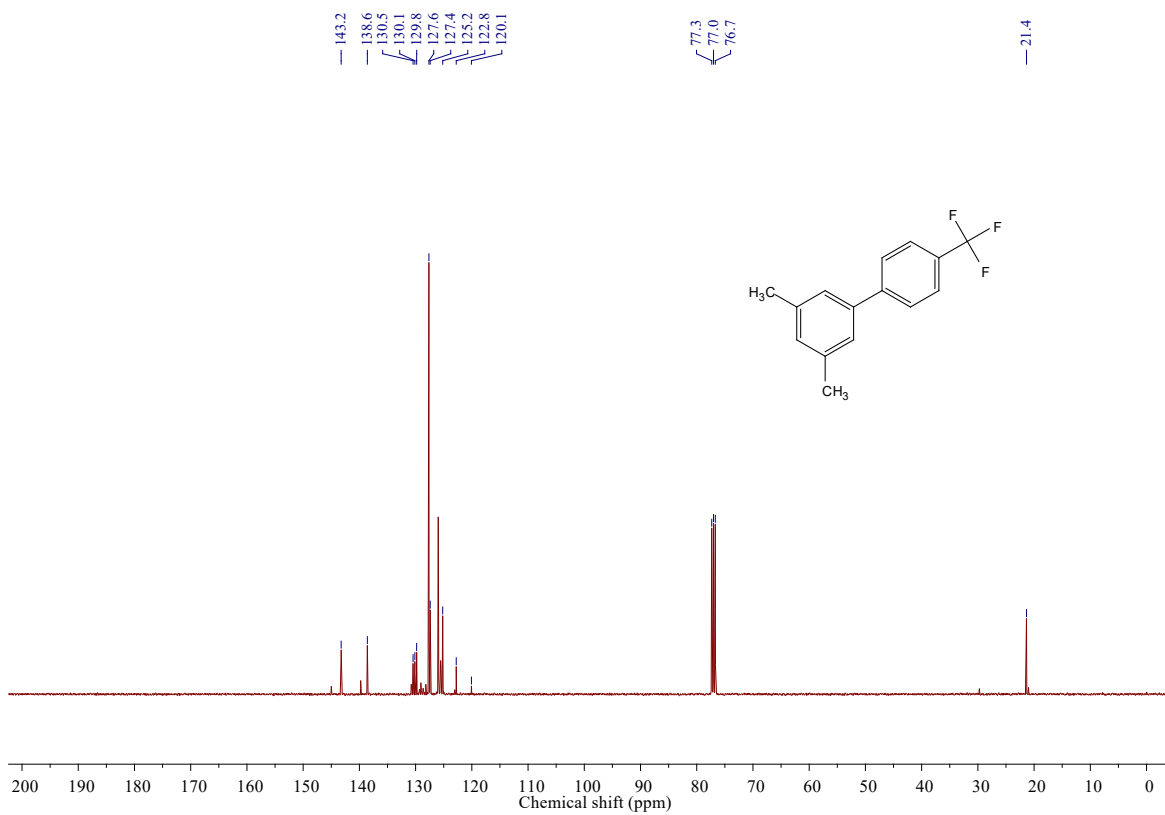

3m.

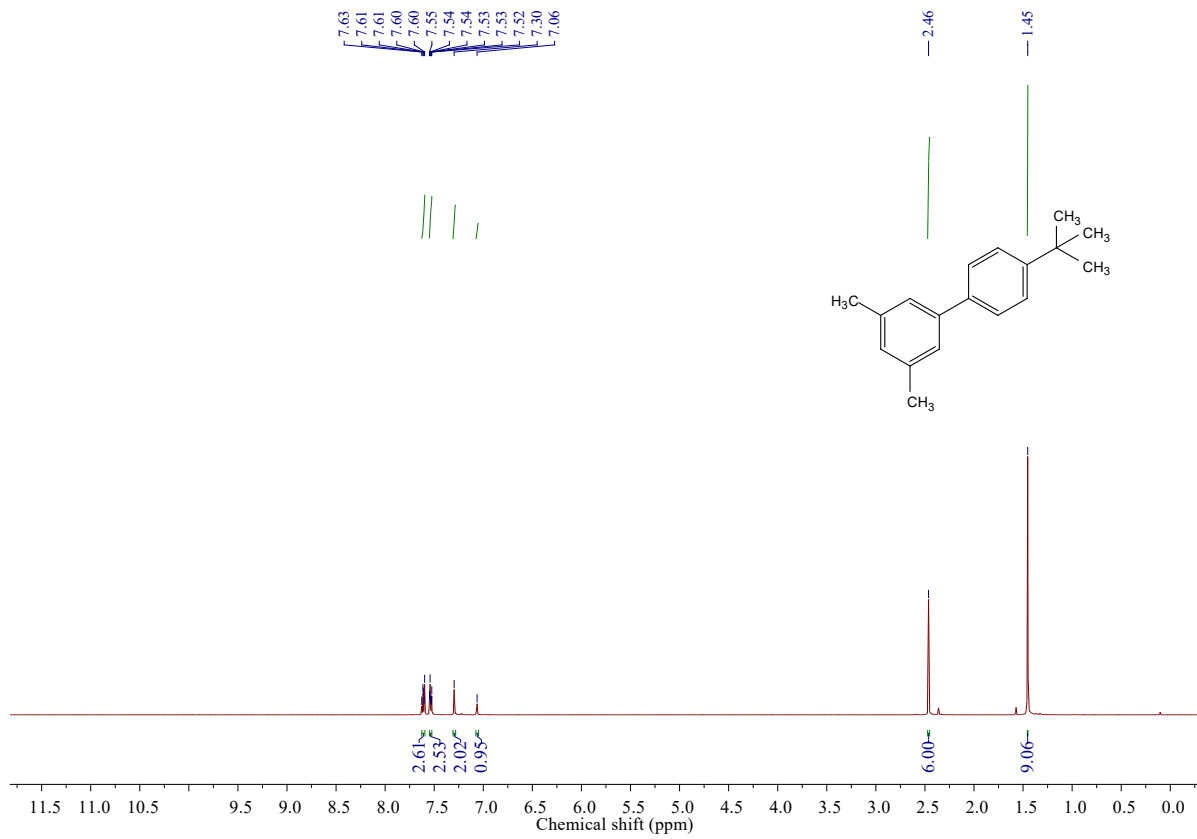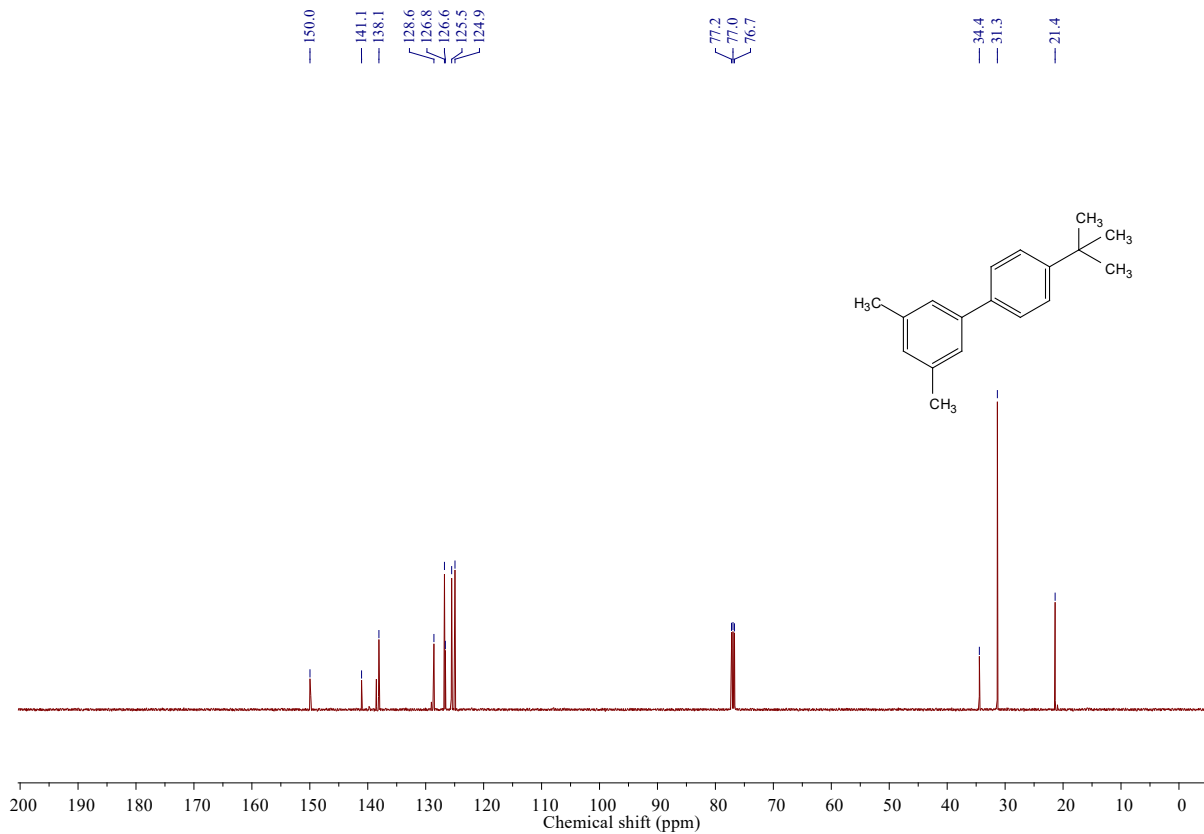

3n.

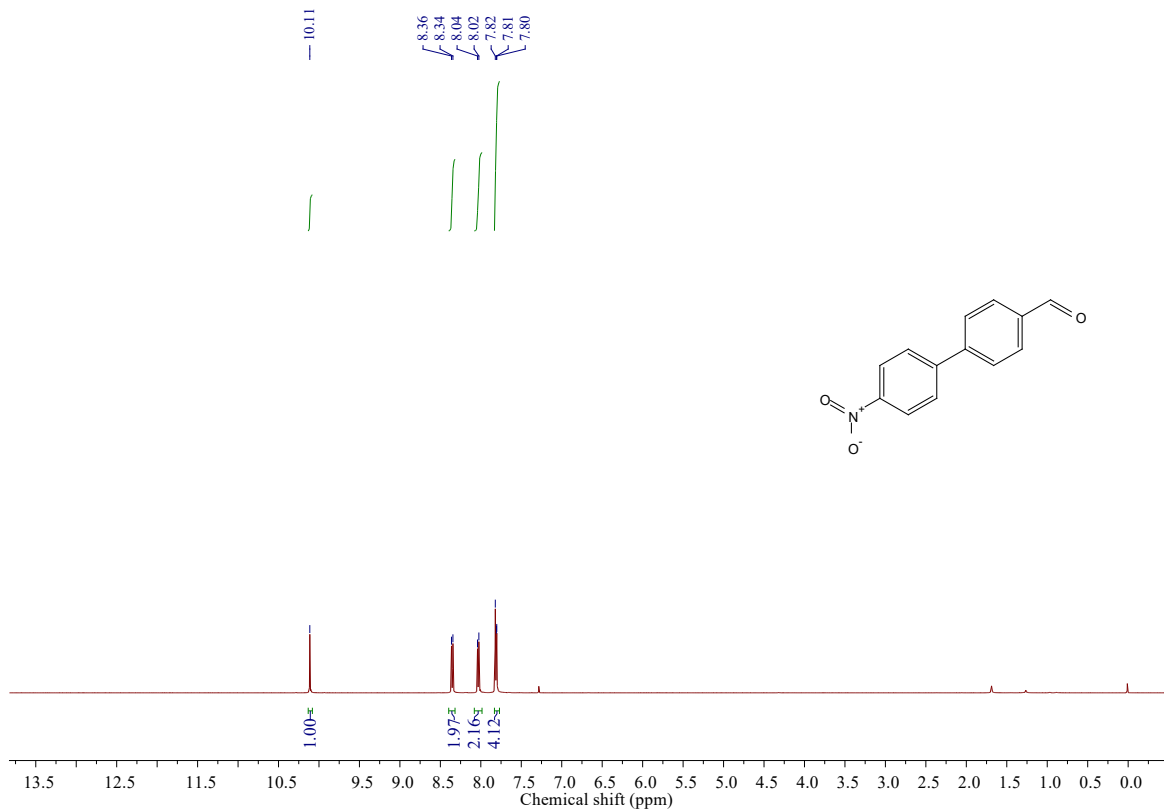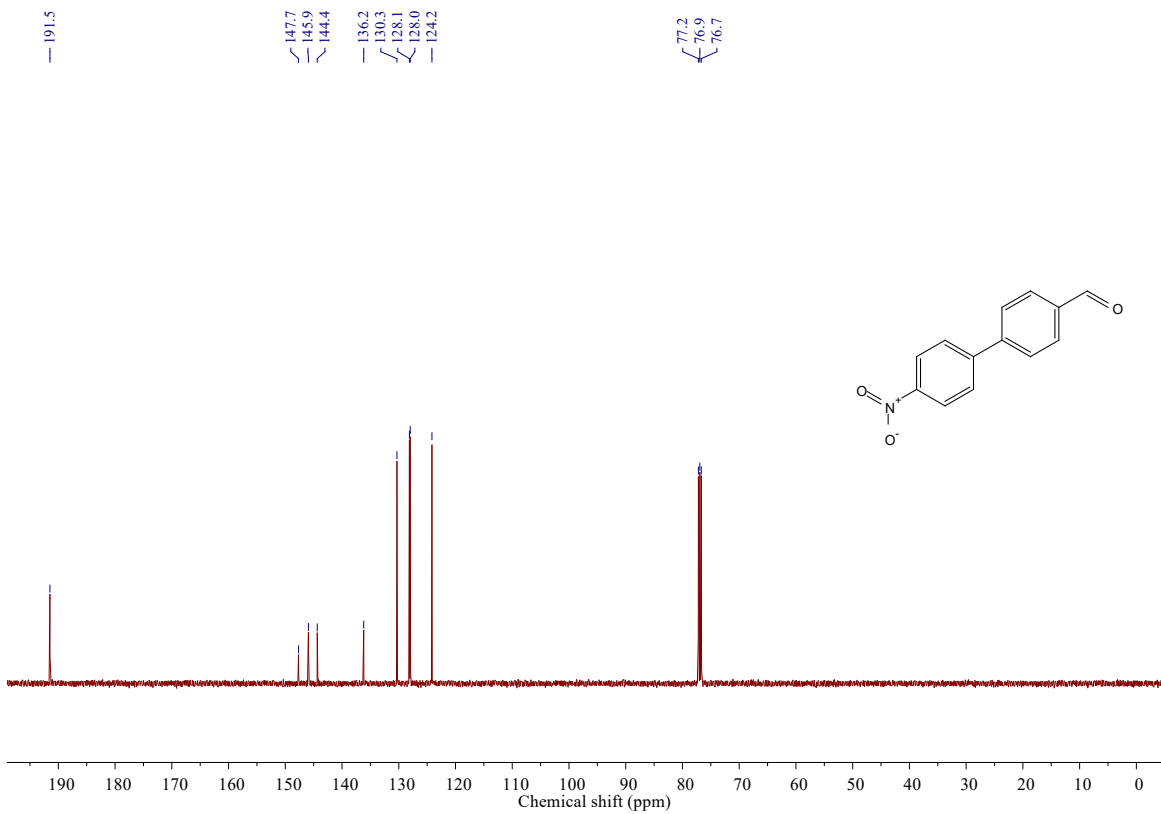

30.

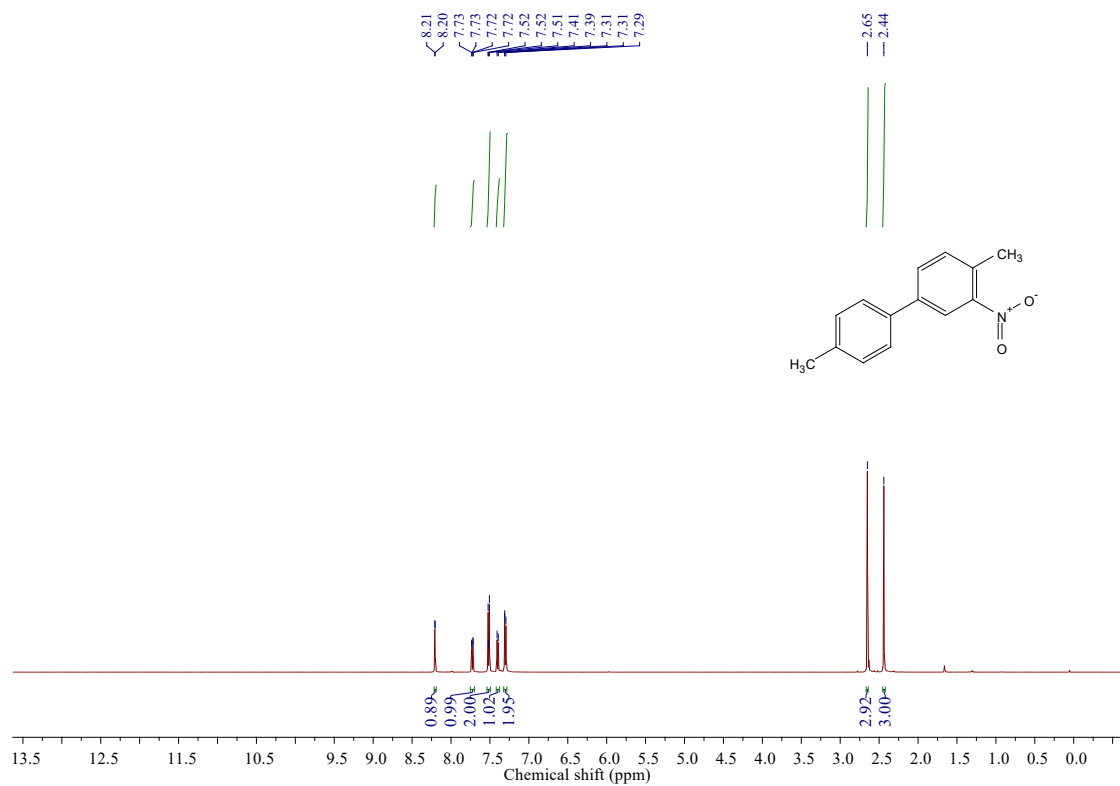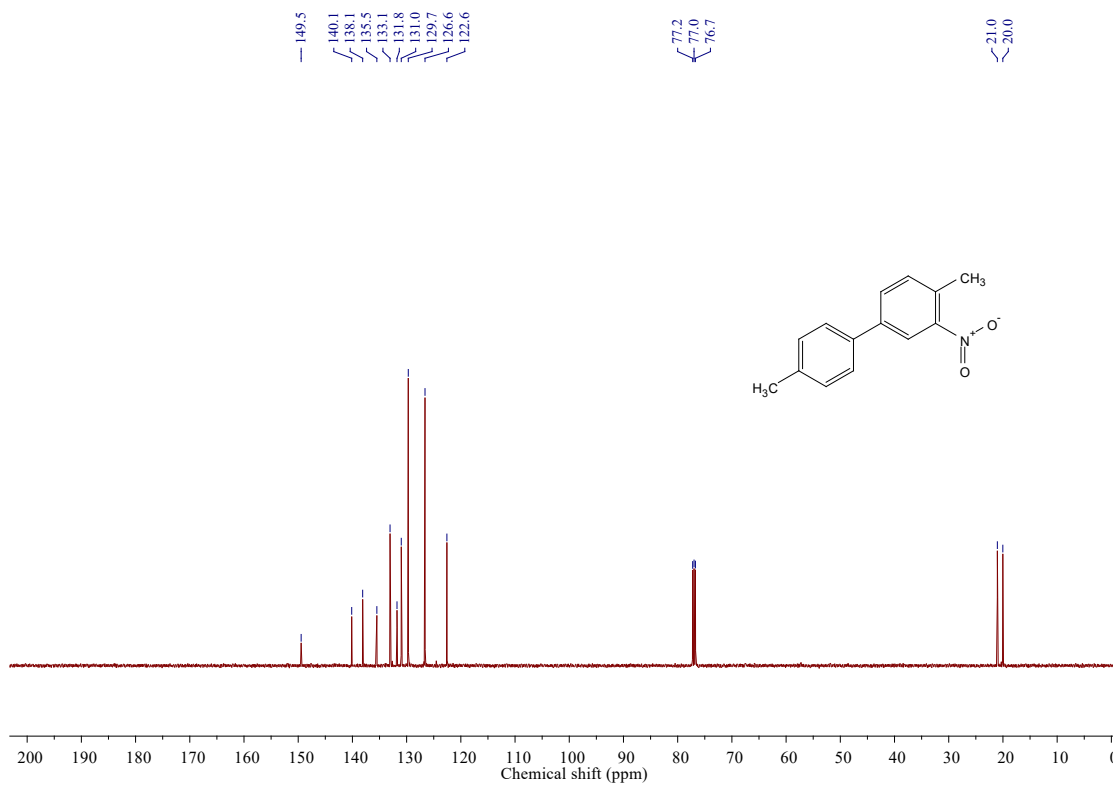



3p.

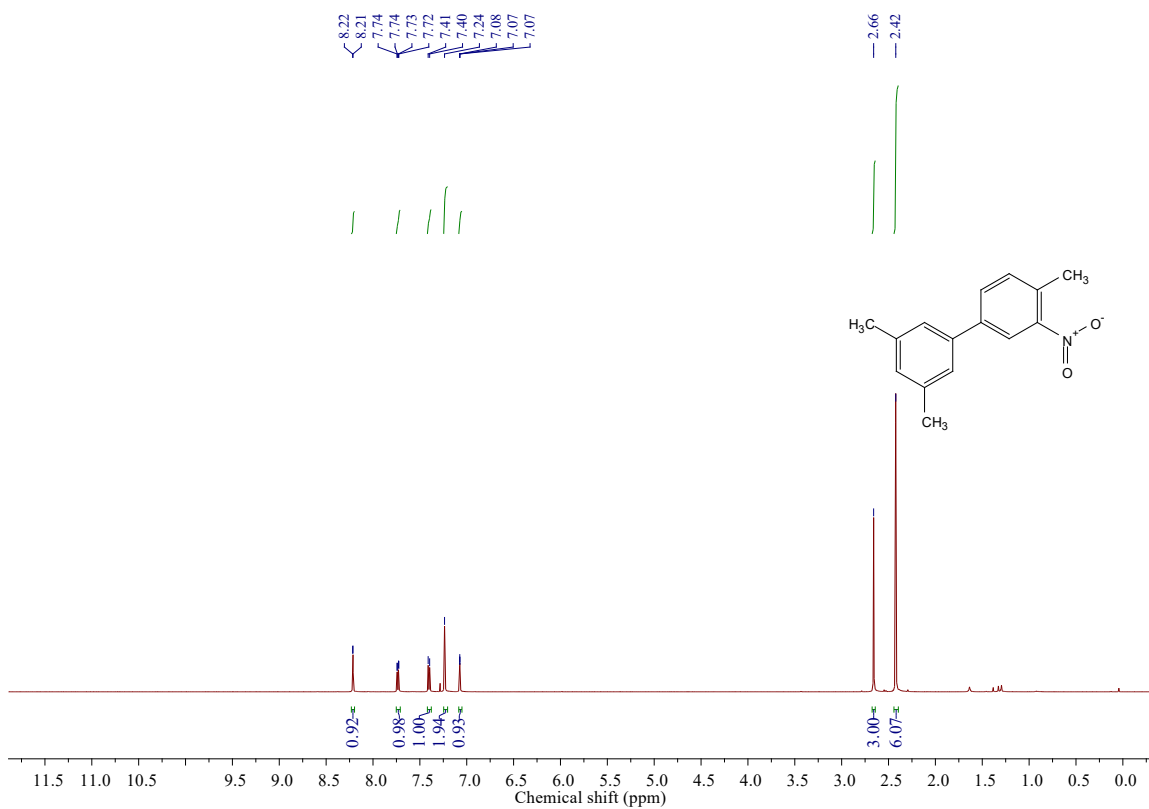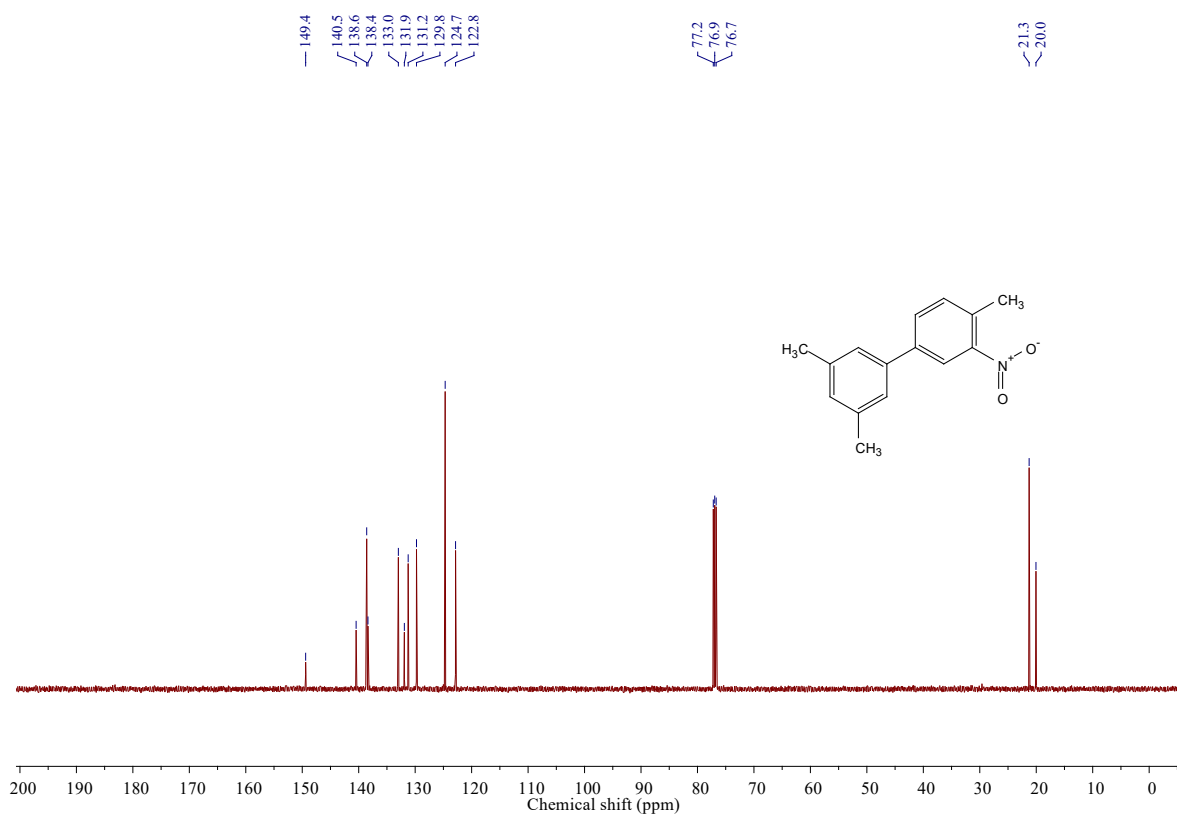

3q.

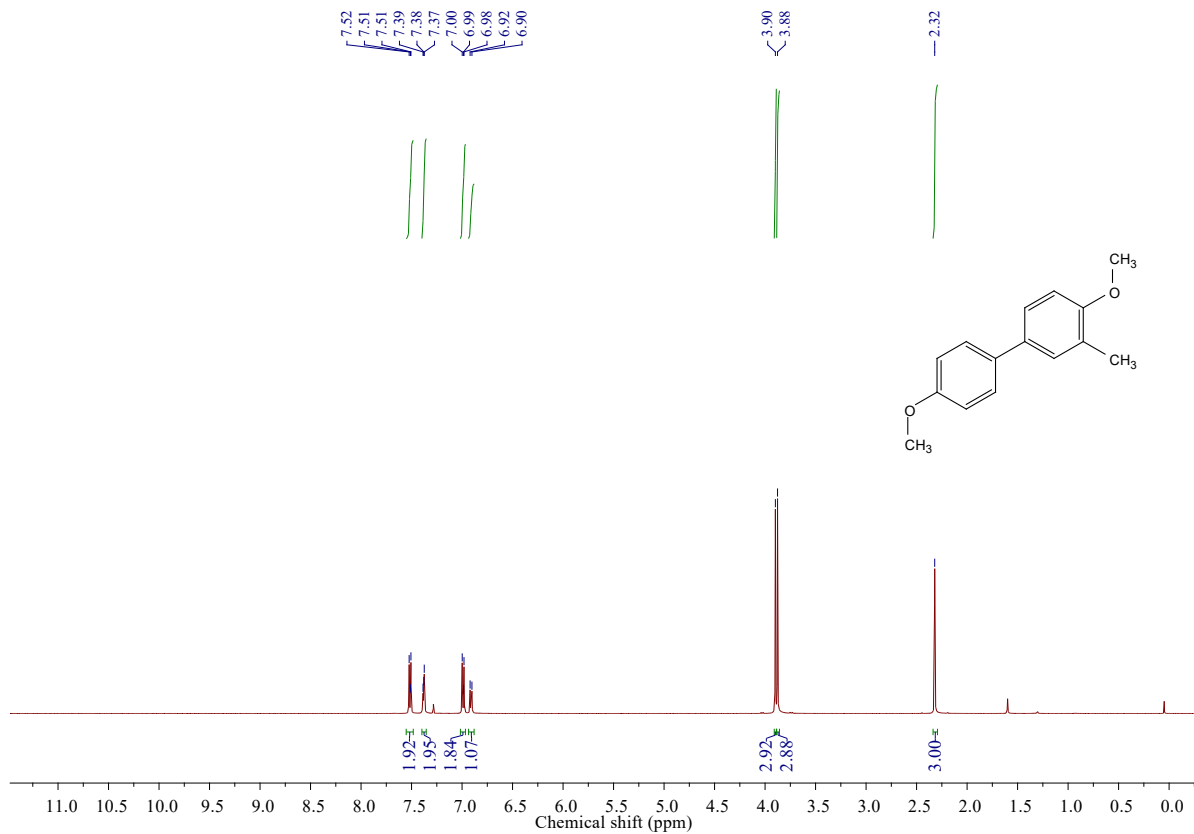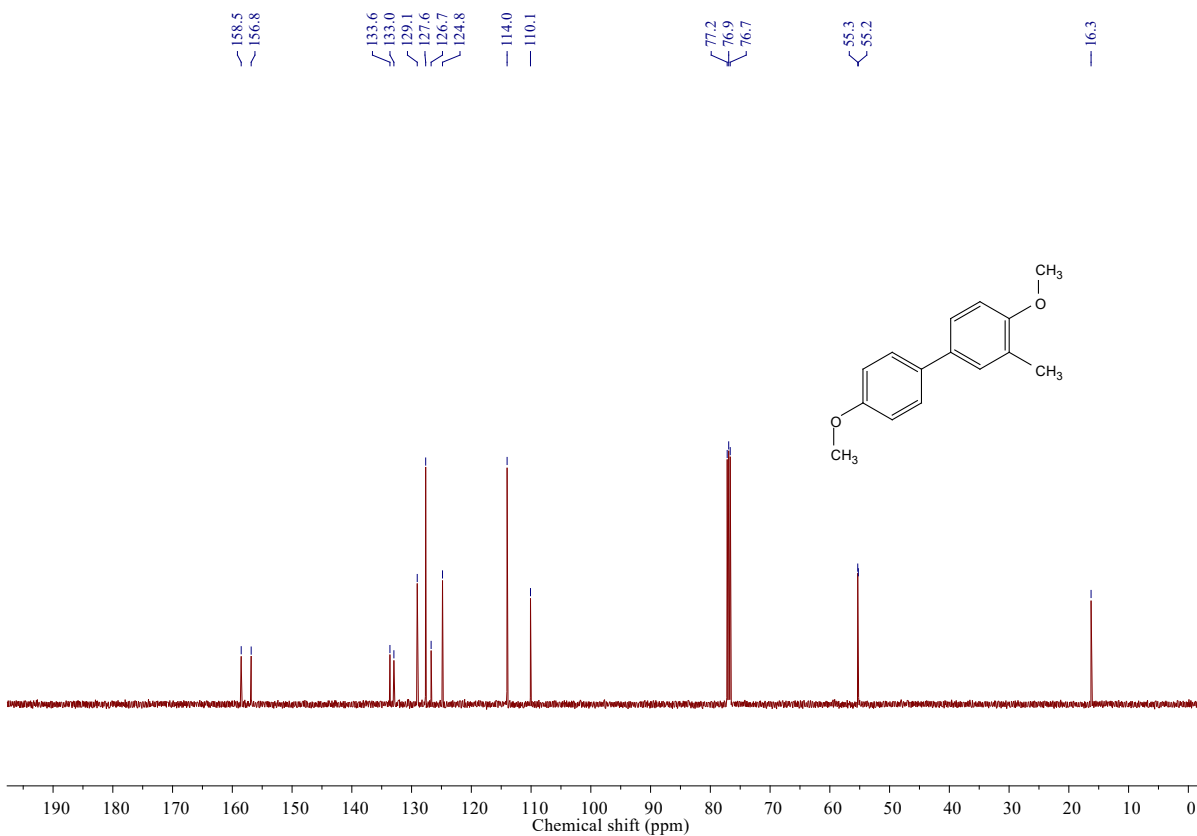

3r.

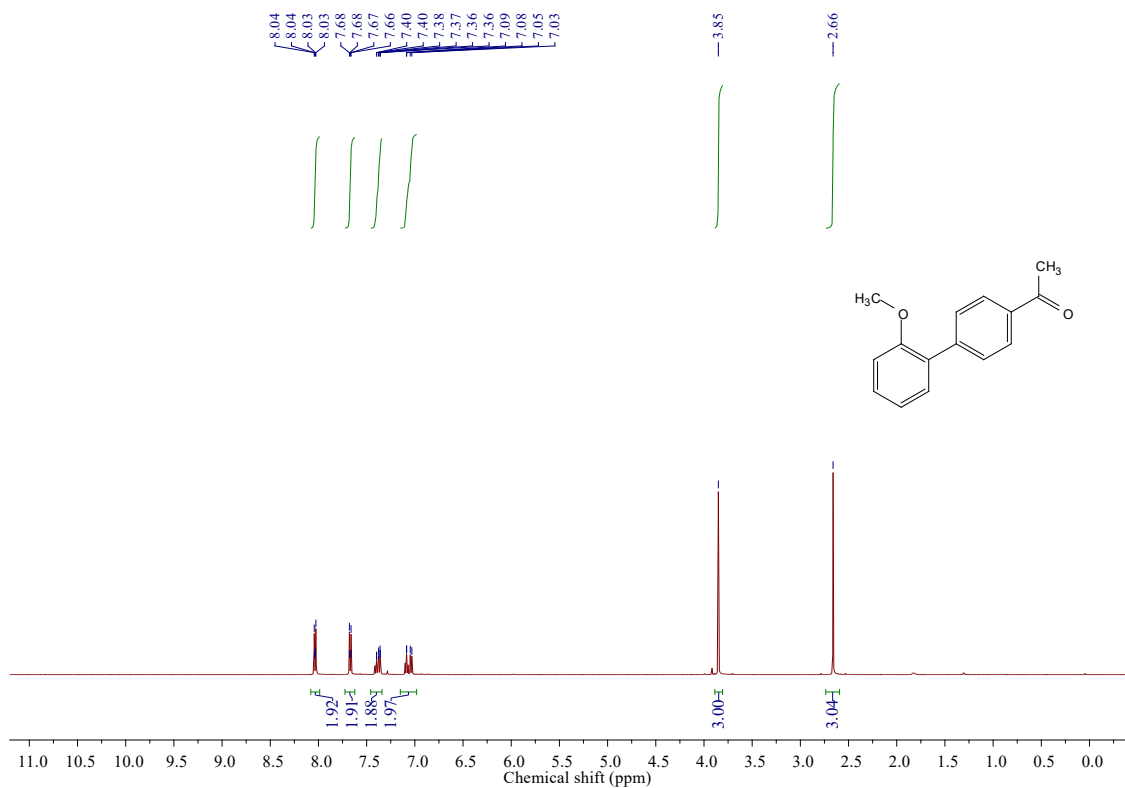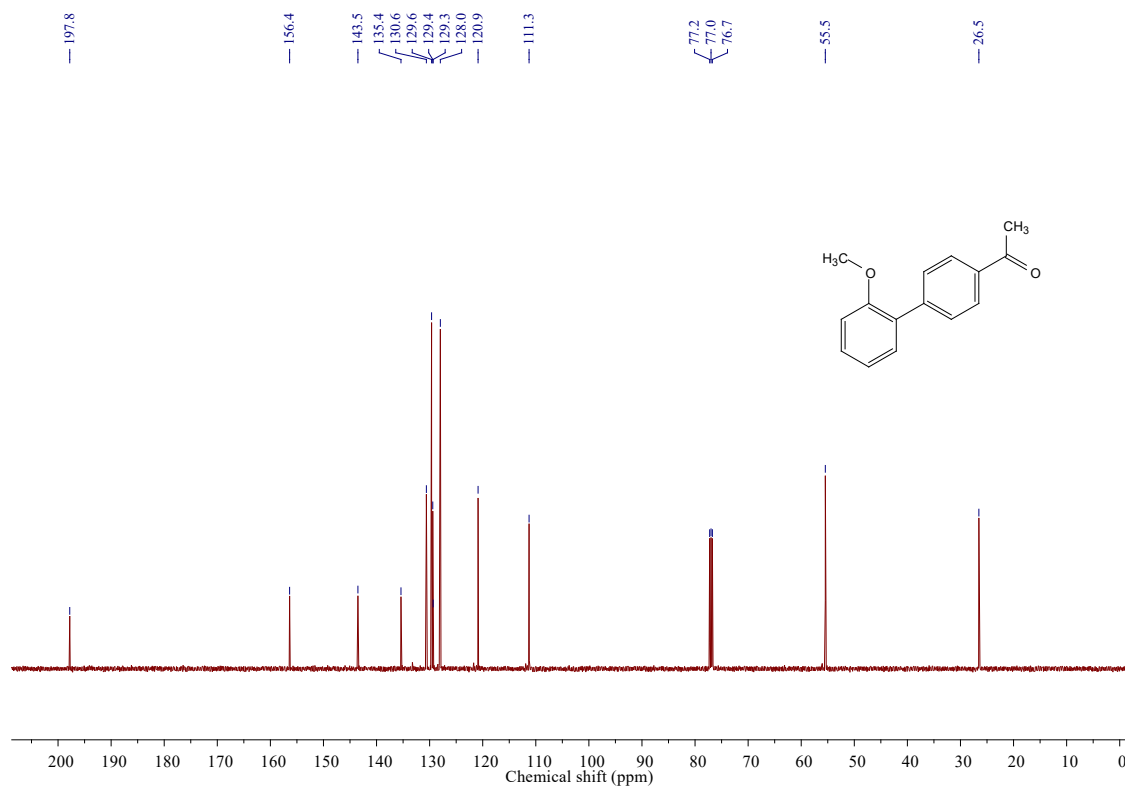

3s.

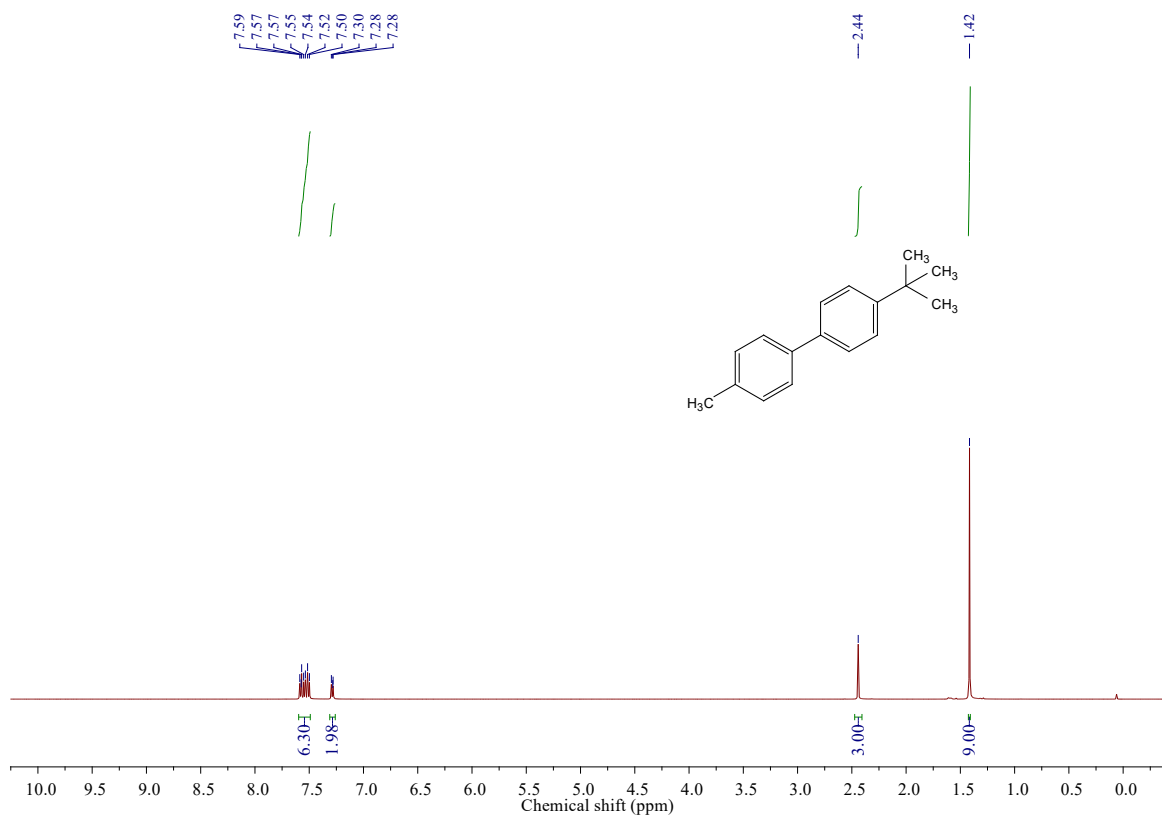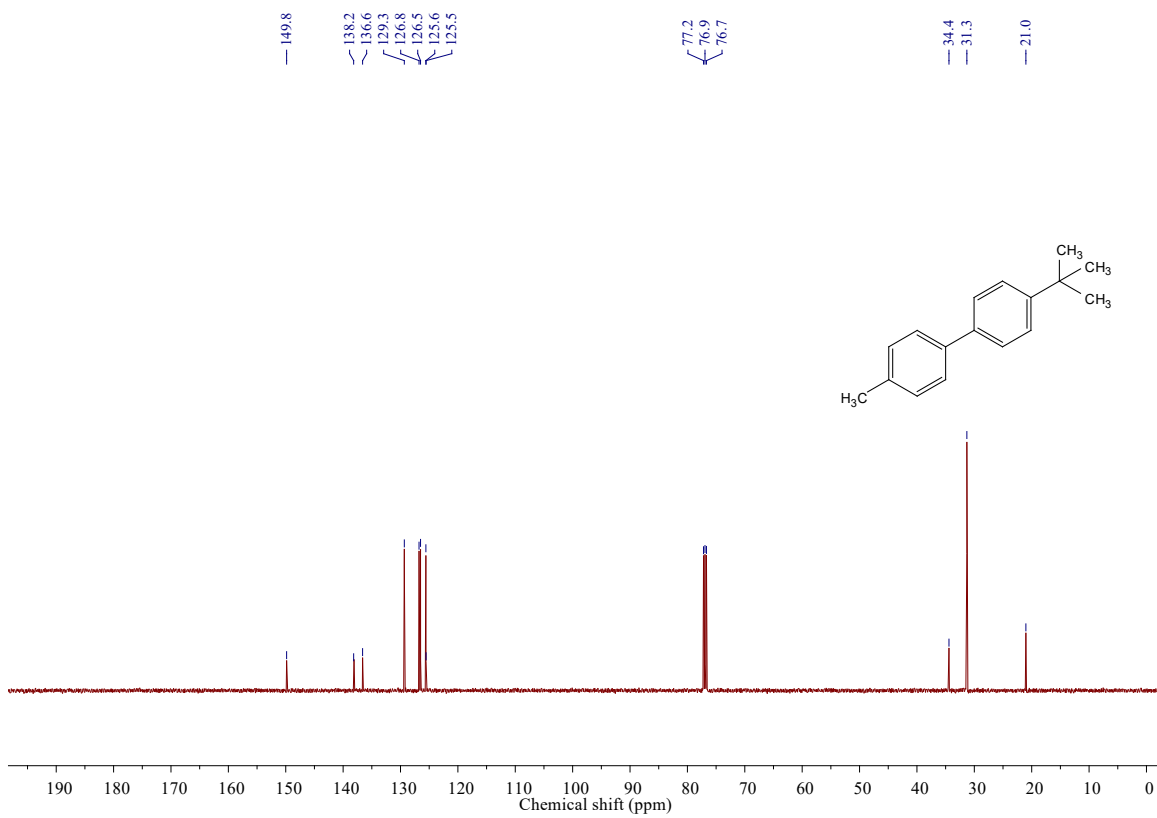

3t.

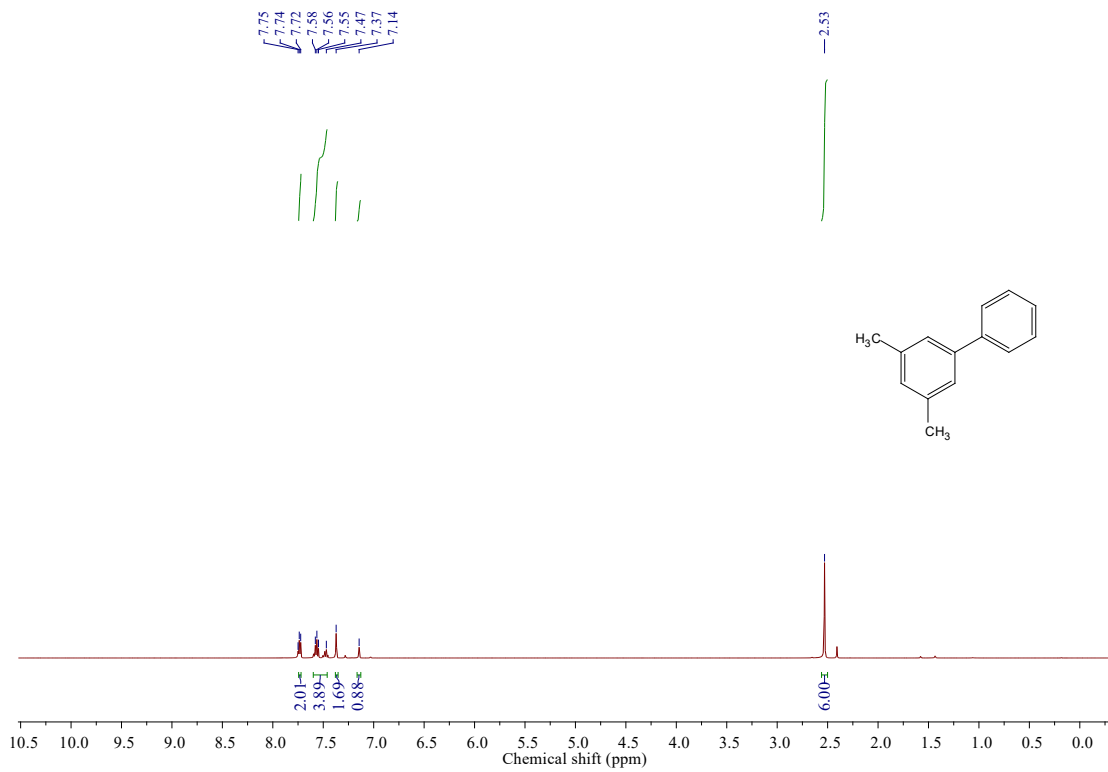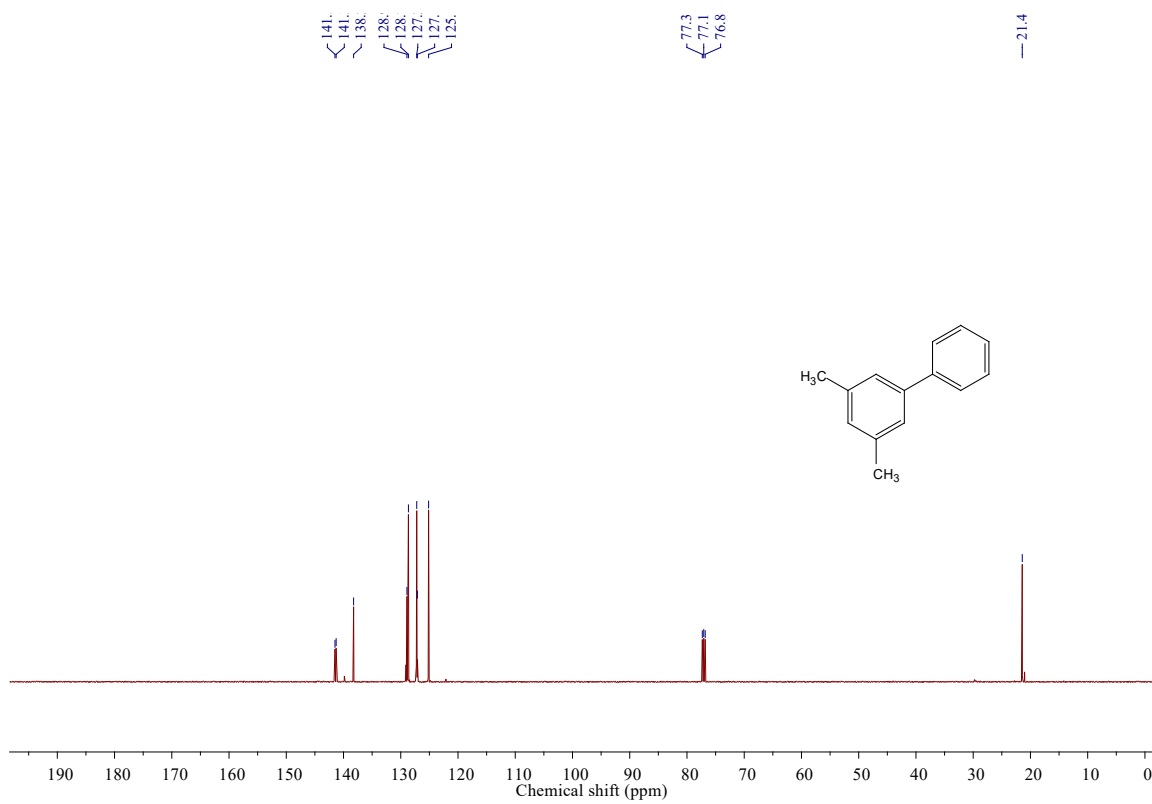

3u.

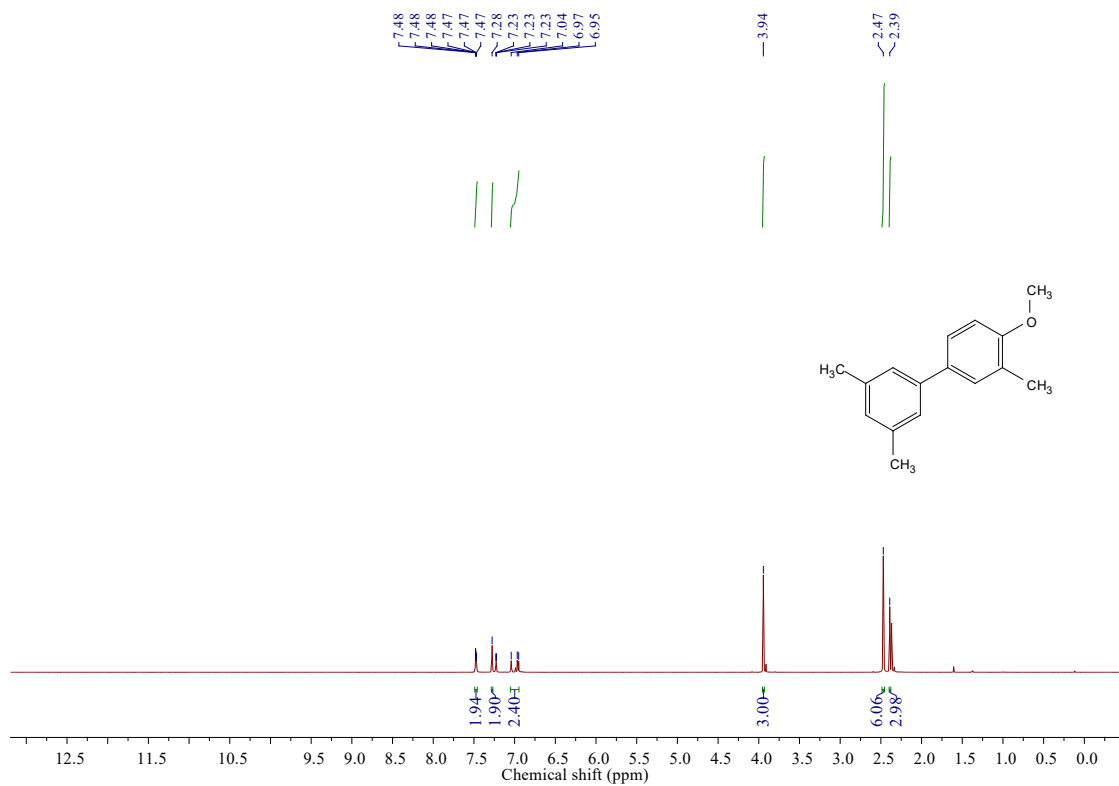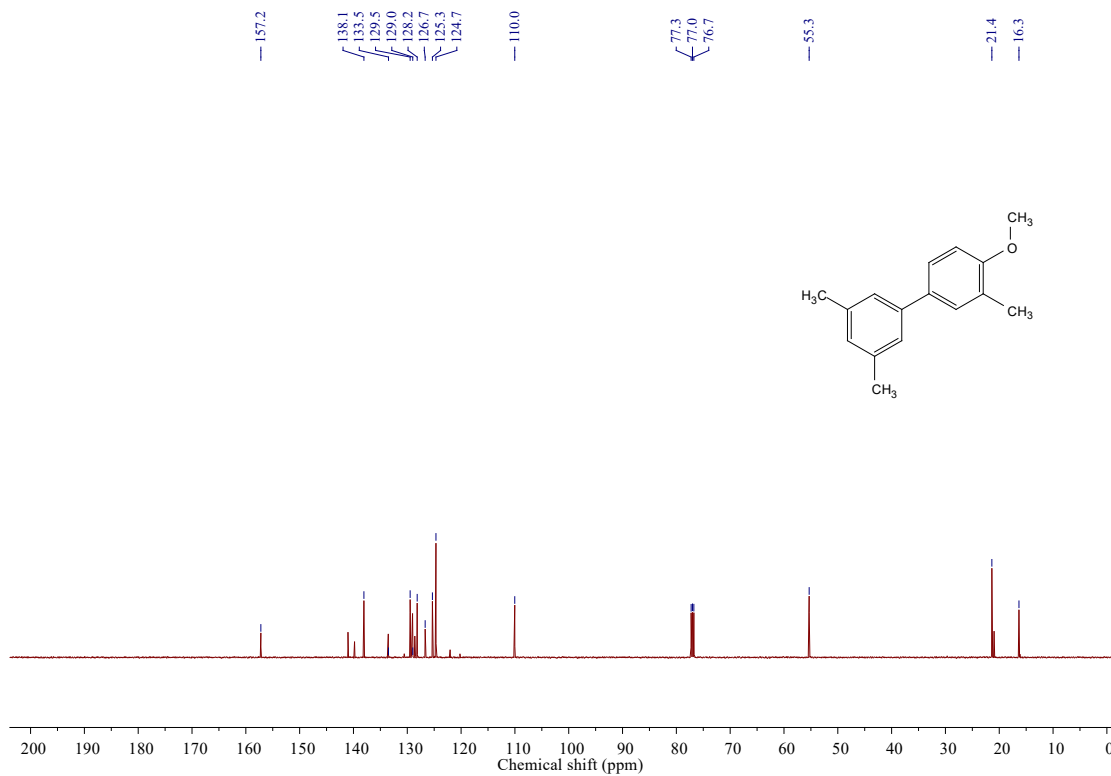

3v.

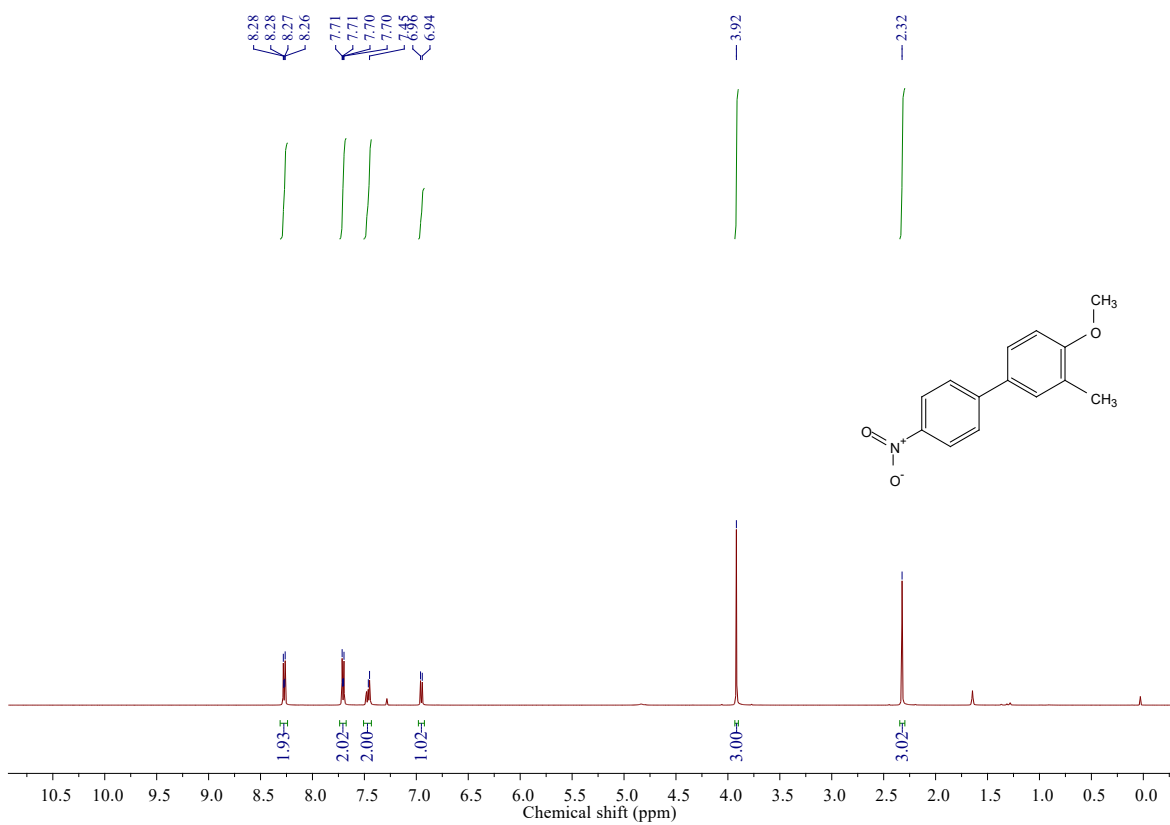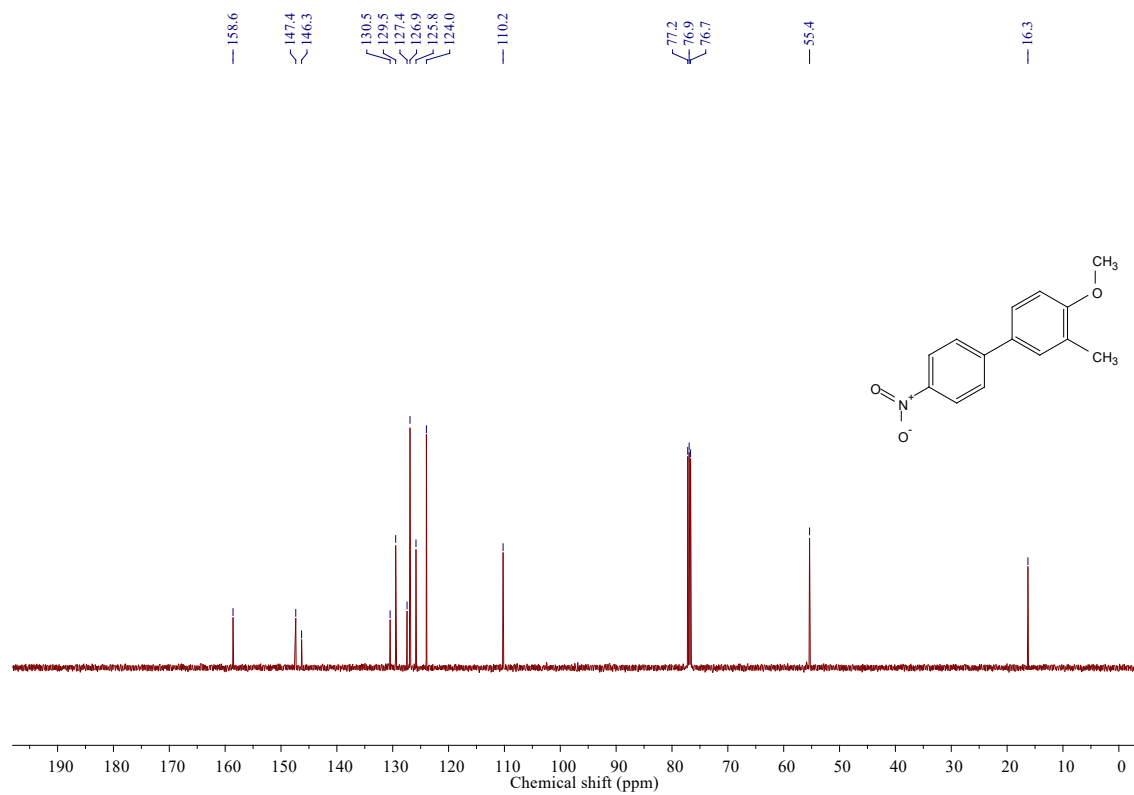

3w.

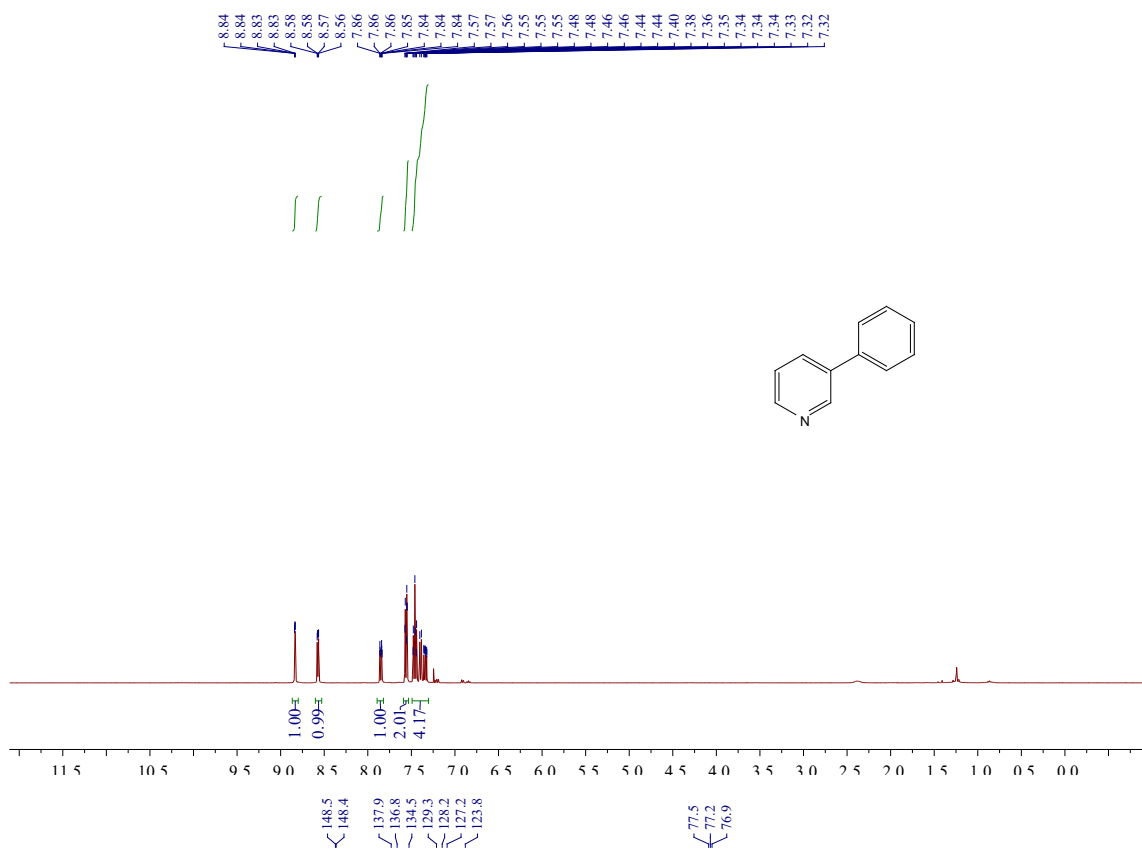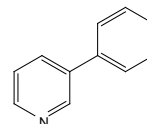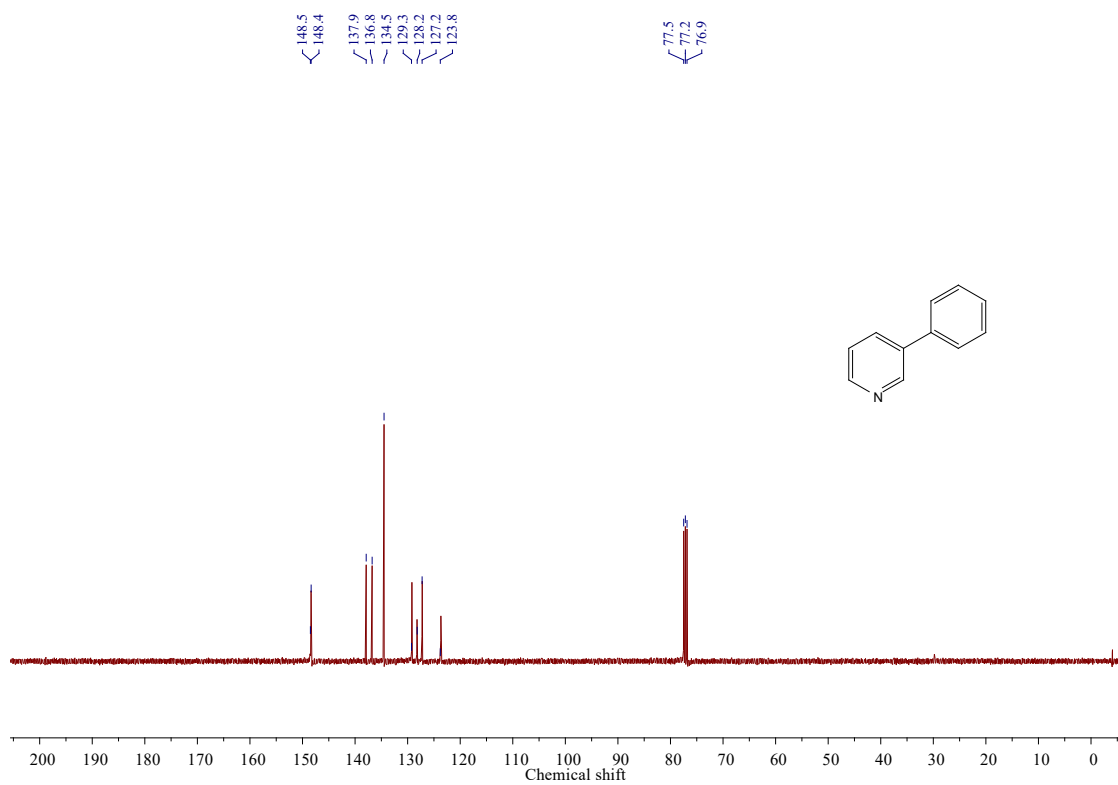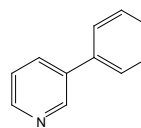



3x.

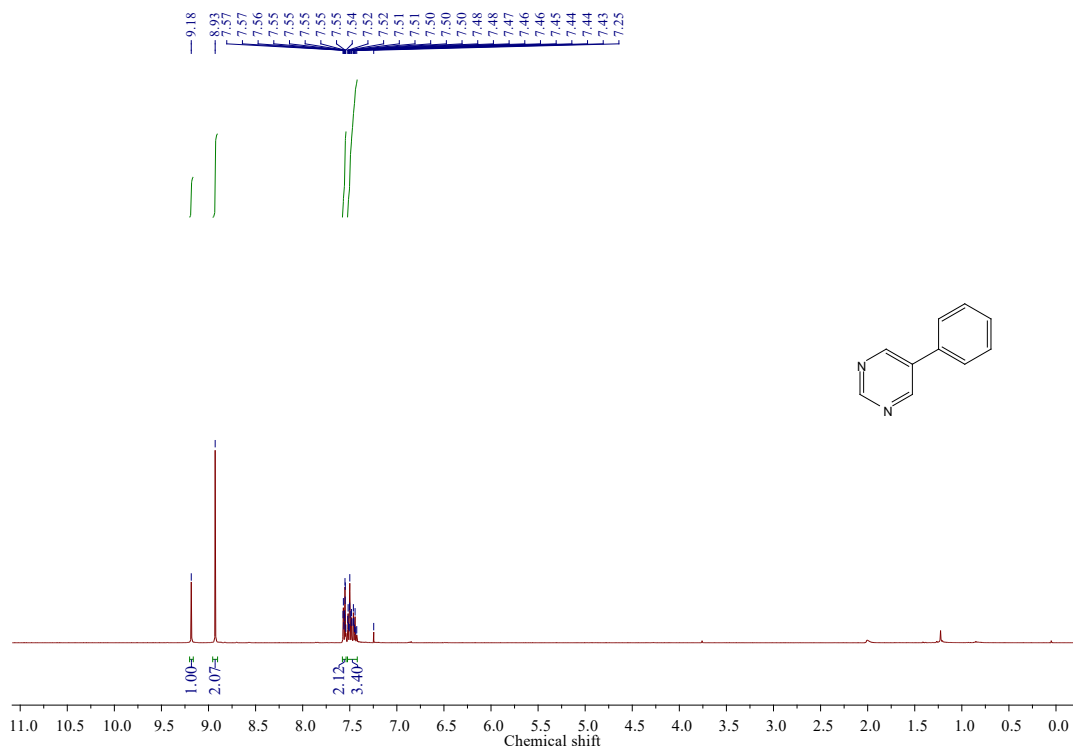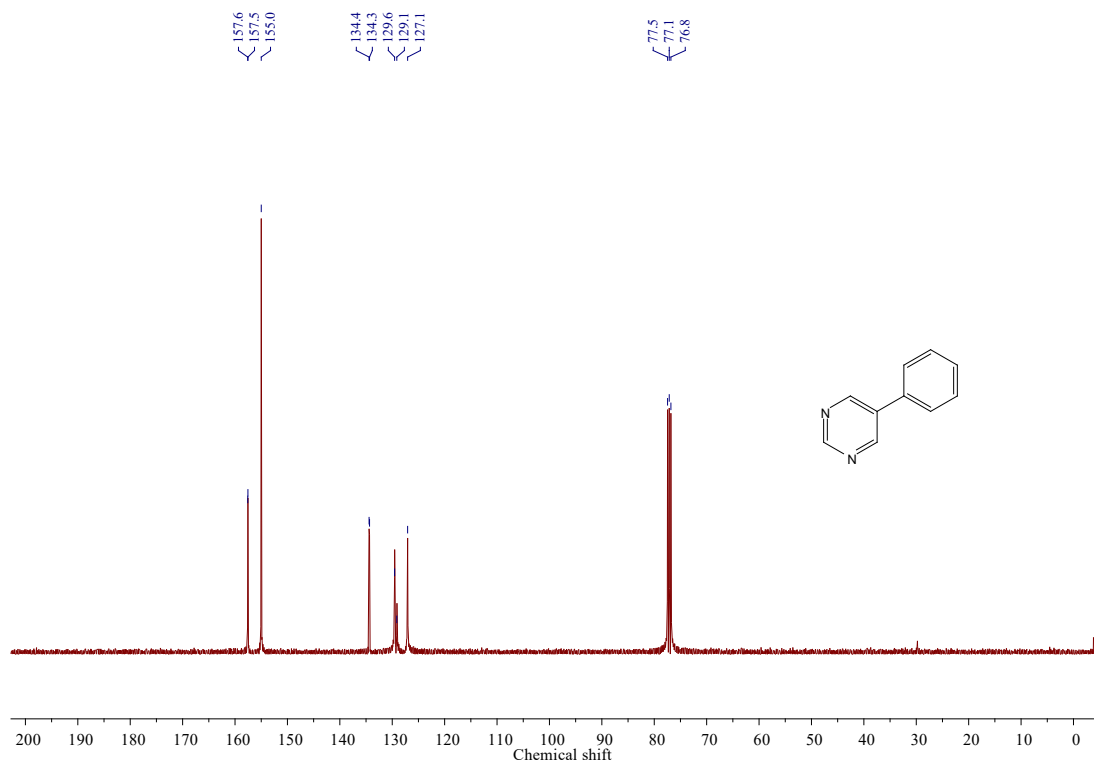

3y.

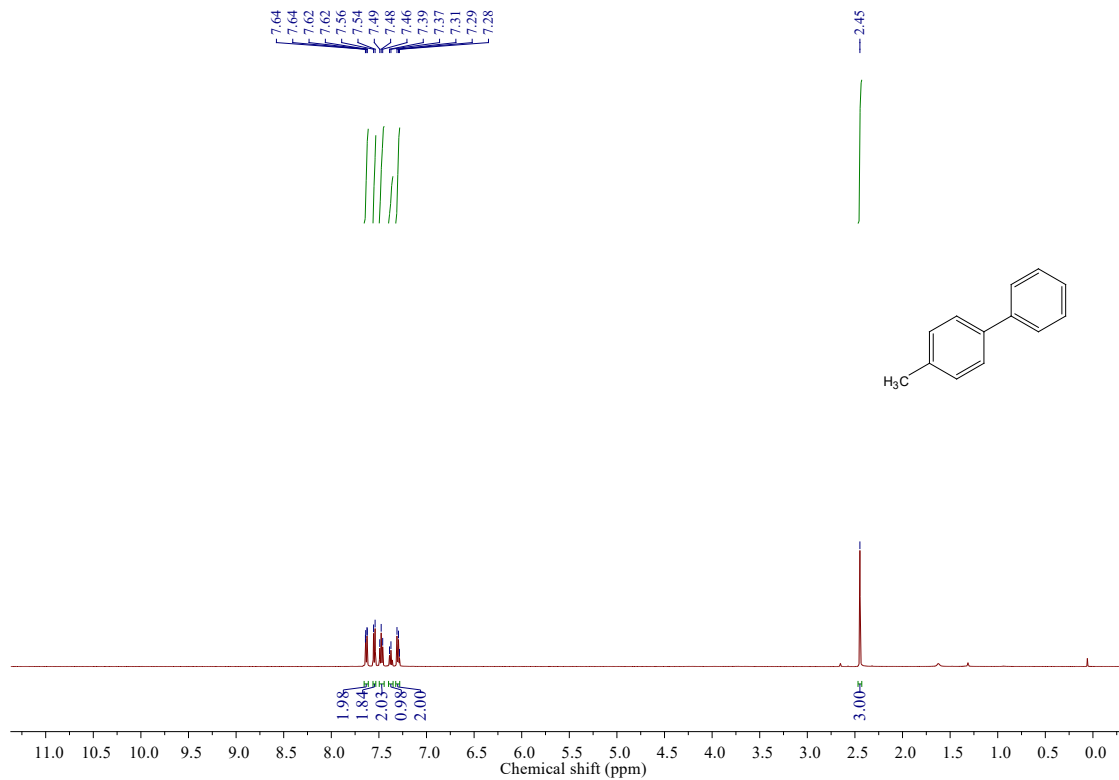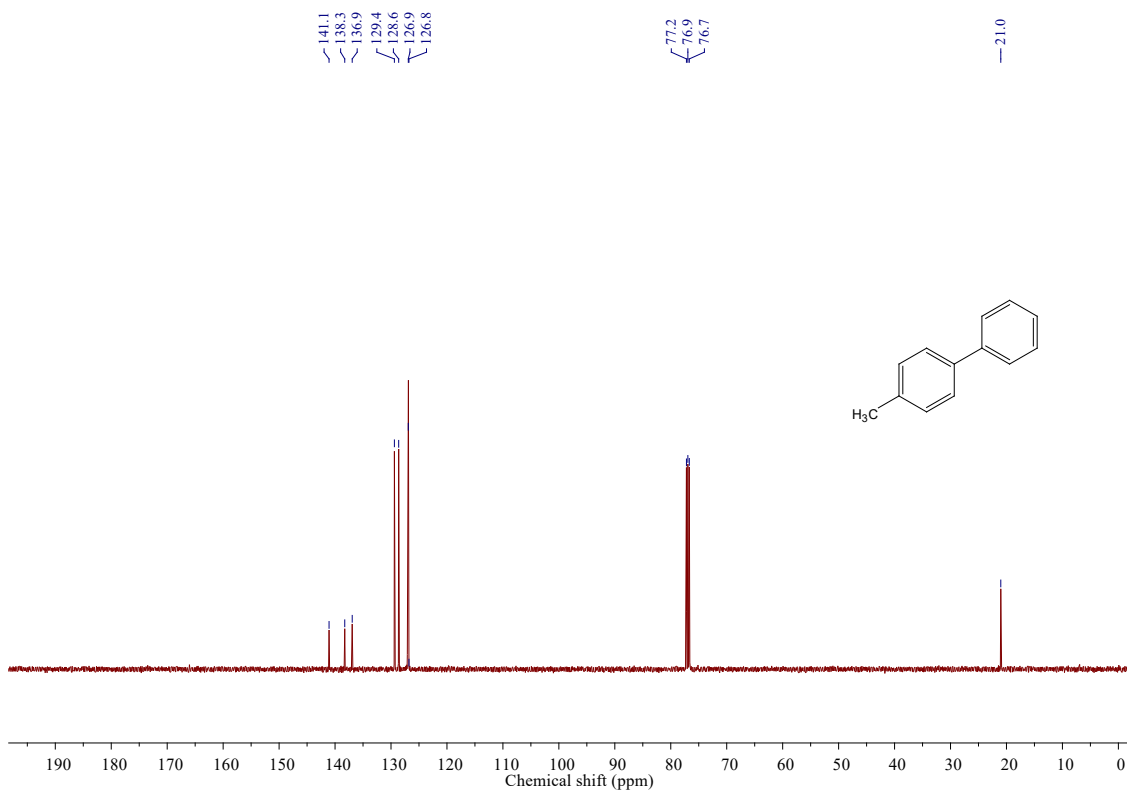

<sup>19</sup>F NMR spectra

3l.

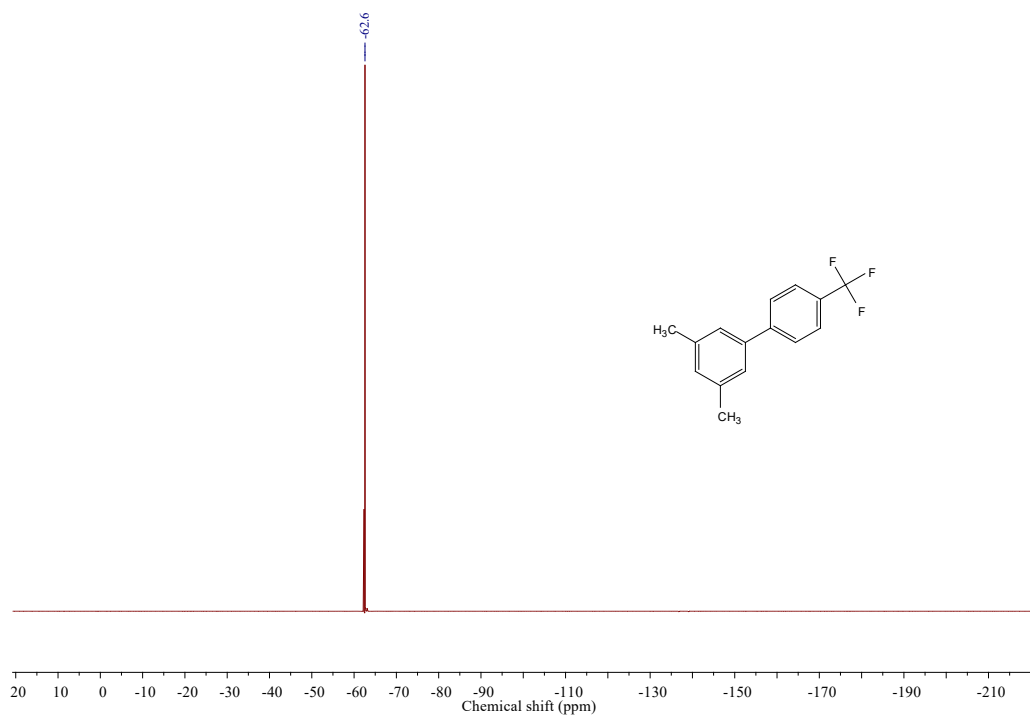

3i.

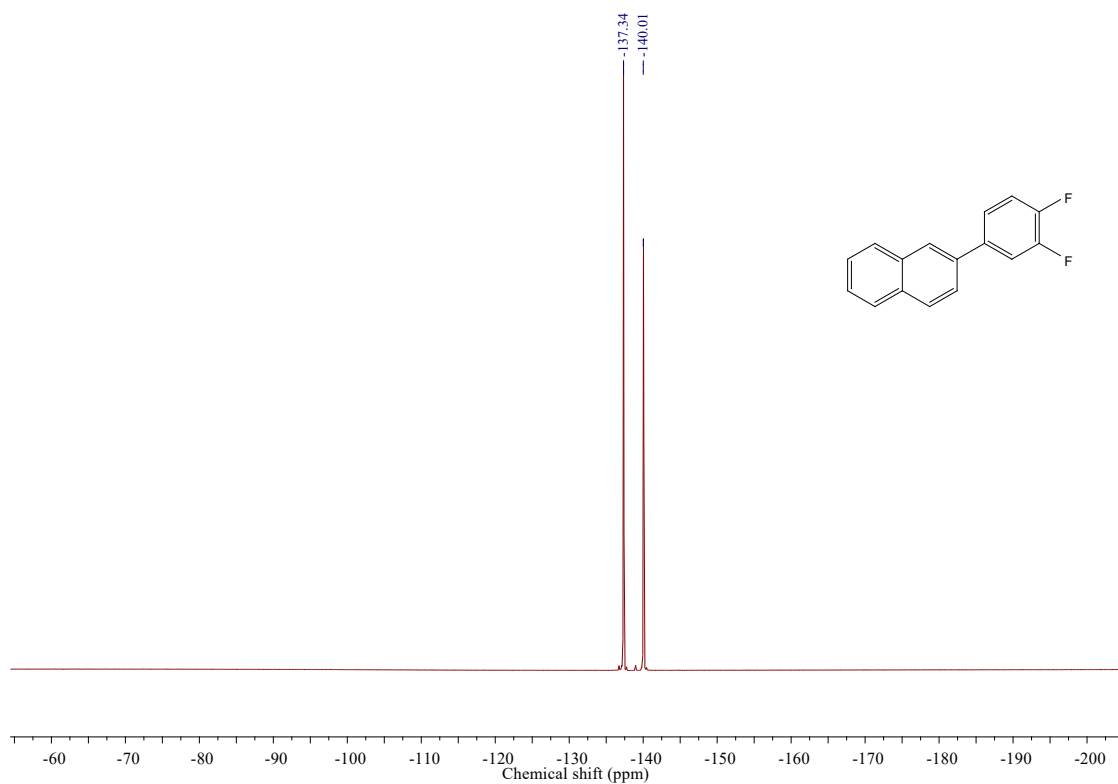

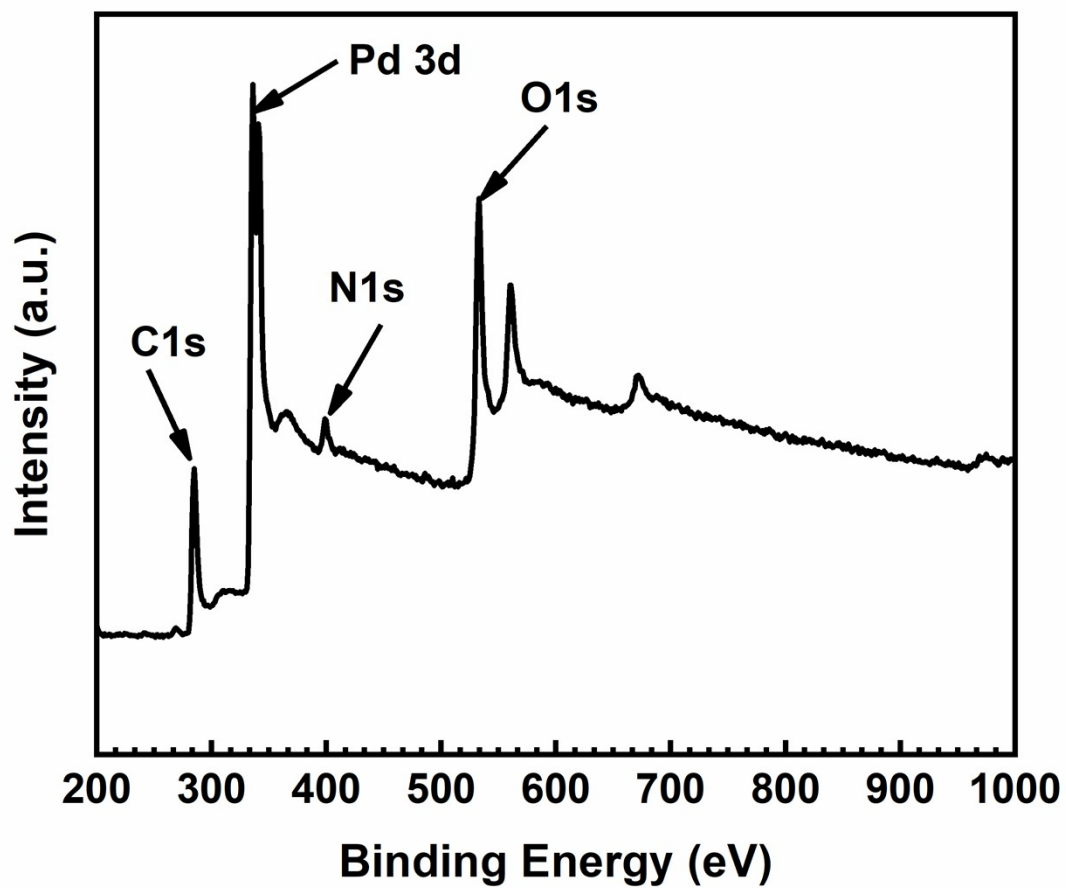

Figure S1: XPS survey spectrum of Pd(0)/g-C<sub>3</sub>N<sub>4</sub>O

## References:

- 1 A. Dewan, M. Sarmah, P. Bharali, A. J. Thakur, P. K. Boruah, M. R. Das and U. Bora, *ACS Sustain. Chem. Eng.*, 2021, **9**, 954-966.
- 2 S. K. Das, A. Dewan, P. Deka, R. Saikia, S. Thakuria, R. C. Deka, A. J. Thakur and U. Bora, *Current Research in Green and Sustainable Chemistry*, 2022, **5**, 100301.
- 3 (a) S. Rostammia and H. Xin, *Appl. Organomet. Chem.*, 2013, **27**, 348-352. (b) L. Li, T. Wu, J. Wang and R. Wang, *ChemPlusChem*, 2014, **79**, 257-265.
- 4 (a) S. J. Sabounchei, M. Ahmadi and M. Z. Nasri, *J. Coord. Chem.*, 2013, **66**, 411-423. (b) S. J. Sabounchei, M. Ahmadi, M. Panahimehr, F. A. Bagherjeri and Z. Nasri, *J. Mol. Catal. A:Chem.*, 2014, **383**, 249-259.
- 5 (a) B. Saikia, *Tetrahedron Lett.*, 2021, **73**, 153103. (b) V. Kandathil, M. Kempasiddaiah, S. K. Nataraj, S. B. Somappa and S. A. Patil, *Appl. Organomet. Chem.*, 2020, **34**, 5357.
- 6 J. Hassan, C. Hathroubi, C. Gozzi and M. Lemaire, *Tetrahedron*, 2001, **57**, 845-7855.
- 7 A. M. Wagner, A. J. Hickman and M. S. Sanford, *Journal of the American Chemical Society*, 2013, **135**, 15710-15713.
- 8 S. Wang, D. Hu, W. Hua, J. Gu, Q. Zhang, X. Jia and K. Xi, *RSC Advances*, 2015, **5**, 53935-53939.
- 9 Patent number US5612360
- 10 (a) C. M. So, H. W. Lee, C. P. Lau and F. Y. Kwong, *Org. Lett.*, 2009, **11**, 317-320. (b) G. Zhang, C. Guan, Y. Zhao, H. Miao and C. Ding, *New J. Chem.*, 2022, **46**, 3560-3564.
- 11 Q. Chen, Z. Mao, F. Guo and X. Liu, *Tetrahedron Lett.*, 2016, **57**, 3735-3738.
- 12 Z. Zhang, Y. Zhang, X. Liu, B. Shen, T. Zhang and Y. Li, *Applied Organometallic Chemistry*, 2018, **32**, 3912.
- 13 E. E. J. Marler and E. E. Turner, *Journal of the Chemical Society (Resumed)*, 1932, **347**, 2391-2394.

14 (a) R. Seki, N. Hara, T. Saito and Y. Nakao, *J. Am. Chem. Soc.*, 2021, **143**, 6388-6394. (b) N. N. Ma, J. A. Ren, X. Liu, X. Q. Chu, W. Rao and Z. L. Shen, *Org. Lett.*, 2022, **24**, 1953-1957.

15 (a) M. Akkoç, N. Buğday, S. Altın, İ. Özdemir and S. Yaşar, *Catalysis Lett.*, 2022, **152**, 1621-1638. (b) M. Akkoc, N. Buğday, S. Altın and S. Yaşar, *Appl. Organomet. Chem.*, 2021, **35**, 6233.

16 (a) G. Rizzo, G. Albano, M. Lo Presti, A. Milella, F. G. Omenetto and G. M. Farinola, *Eur. J. Org. Chem.*, 2020, **2020**, 6992-6996. (b) J. L. Lamola, P.T. Moshapo, C. W. Holzapfel and M. C. Maumela, *RSC Adv.*, 2021, **11**, 26883-26891.

17 Z. L. Shen, K. Sommer, P. Knochel, *Synthesis*, 2015, **47**, 2617-2630.
